# Supplementary material for: The investment case as a mechanism for addressing the NCD burden: Evaluating the NCD institutional context in Jamaica, and the return on investment of select interventions
Source: PLOS journal article supplement (doi:10.1371/journal.pone.0223412), 2019-10-04
Supplement: S3 (10.1371/journal.pone.0223412.s003) [file journal.pone.0223412.s003]

Tag	Description	Notes	Data
<General>
	File title
			NC Data File
	Version
			1.1
	First Year
			2016
	Final Year
			2032
	Projection valid?
			no
<First Age>
			9
<Final Age>
			13
<Health States by disease>
			16
			1	7
			1	3	4	2	27	26	28
			2	1
			1
			3	4
			1	3	19	24
			4	4
			1	3	20	24
			5	4
			1	3	21	24
			6	4
			1	3	22	24
			7	1
			1
			8	1
			1
			9	4
			1	3	46	24
			10	4
			1	3	47	24
			11	4
			1	3	48	24
			12	4
			1	3	49	24
			13	4
			1	3	50	24
			14	4
			1	3	52	24
			15	4
			1	3	53	24
			16	6
			1	3	54	55	56	24
<Projection Valid Date>
	Projection valid date:
			06/16/17 08:46:51 PM Spectrum 5.45
<PeriNatal Flag>
			1
<State Association>
	DiseaseID	1	1
	StateID	3
	NumExits	2
		<Age ID>	<DW>	<Baseline Prevalence>	<TransName>	<Rate>	<ToState>	<TransName>	<Rate>	<ToState>
	<Start>
		1	0.04596	0	2	0	4	2	0	2
		2	0.06118	0	2	0	4	2	0	2
		3	0.0764	0	2	0	4	2	0	2
		4	0.09162	0	2	0	4	2	0	2
		5	0.10685	0	2	5E-5	4	2	2E-5	2
		6	0.12207	0	2	7E-5	4	2	2E-5	2
		7	0.1449	0	2	0.00052	4	2	0.00037	2
		8	0.17535	0	2	0.00192	4	2	0.00148	2
		9	0.2058	0	2	0.00427	4	2	0.00335	2
		10	0.23624	0	2	0.00958	4	2	0.01067	2
		11	0.26669	0	2	0.01313	4	2	0.01868	2
		12	0.30474	0	2	0.01778	4	2	0.02846	2
	<End>
<End>
<State Association>
	DiseaseID	1	1
	StateID	4
	NumExits	3
		<Age ID>	<DW>	<Baseline Prevalence>	<TransName>	<Rate>	<ToState>	<TransName>	<Rate>	<ToState>	<TransName>	<Rate>	<ToState>
	<Start>
		1	0.8	0	5	0.60517	13	8	0	3	3	13.03571	27
		2	0.8	0	5	0.60523	13	8	0	3	3	13.03571	27
		3	0.8	0	5	0.60514	13	8	0	3	3	13.03571	27
		4	0.8	0	5	0.60504	13	8	0	3	3	13.03571	27
		5	0.8	0	5	0.58479	13	8	0	3	3	13.03571	27
		6	0.8	0	5	0.58471	13	8	0	3	3	13.03571	27
		7	0.8	0	5	0.58487	13	8	0	3	3	13.03571	27
		8	0.8	0	5	0.58728	13	8	0	3	3	13.03571	27
		9	0.8	0	5	0.59194	13	8	0	3	3	13.03571	27
		10	0.8	0	5	0.61817	13	8	0	3	3	13.03571	27
		11	0.8	0	5	0.65182	13	8	0	3	3	13.03571	27
		12	0.8	0	5	0.69512	13	8	0	3	3	13.03571	27
	<End>
<End>
<State Association>
	DiseaseID	1	1
	StateID	2
	NumExits	3
		<Age ID>	<DW>	<Baseline Prevalence>	<TransName>	<Rate>	<ToState>	<TransName>	<Rate>	<ToState>	<TransName>	<Rate>	<ToState>
	<Start>
		1	0.8	0	5	0.69329	13	8	0	3	3	13.03571	26
		2	0.8	0	5	0.63597	13	8	0	3	3	13.03571	26
		3	0.8	0	5	0.58339	13	8	0	3	3	13.03571	26
		4	0.8	0	5	0.53516	13	8	0	3	3	13.03571	26
		5	0.8	0	5	0.95	13	8	0	3	3	13.03571	26
		6	0.8	0	5	0.95	13	8	0	3	3	13.03571	26
		7	0.8	0	5	0.50422	13	8	0	3	3	13.03571	26
		8	0.8	0	5	0.23664	13	8	0	3	3	13.03571	26
		9	0.8	0	5	0.19727	13	8	0	3	3	13.03571	26
		10	0.8	0	5	0.19612	13	8	0	3	3	13.03571	26
		11	0.8	0	5	0.25115	13	8	0	3	3	13.03571	26
		12	0.8	0	5	0.35734	13	8	0	3	3	13.03571	26
	<End>
<End>
<State Association>
	DiseaseID	1	1
	StateID	27
	NumExits	3
		<Age ID>	<DW>	<Baseline Prevalence>	<TransName>	<Rate>	<ToState>	<TransName>	<Rate>	<ToState>	<TransName>	<Rate>	<ToState>
	<Start>
		1	0.6	0	5	9E-5	13	8	0	3	2	1E-5	28
		2	0.6	0	5	0.00024	13	8	0	3	2	1E-5	28
		3	0.6	0	5	0.00064	13	8	0	3	2	1E-5	28
		4	0.6	0	5	0.00167	13	8	0	3	2	1E-5	28
		5	0.6	1E-5	5	0.00458	13	8	0	3	2	1E-5	28
		6	0.6	1E-5	5	0.00687	13	8	0	3	2	0.00029	28
		7	0.6	0.00062	5	0.02075	13	8	0	3	2	0.00087	28
		8	0.6	0.00227	5	0.0302	13	8	0	3	2	0.00275	28
		9	0.6	0.00498	5	0.03524	13	8	0	3	2	0.0067	28
		10	0.6	0.01519	5	0.04077	13	8	0	3	2	0.01511	28
		11	0.6	0.02504	5	0.05401	13	8	0	3	2	0.02908	28
		12	0.6	0.02637	5	0.12452	13	8	0	3	2	0.05792	28
	<End>
<End>
<State Association>
	DiseaseID	1	1
	StateID	26
	NumExits	3
		<Age ID>	<DW>	<Baseline Prevalence>	<TransName>	<Rate>	<ToState>	<TransName>	<Rate>	<ToState>	<TransName>	<Rate>	<ToState>
	<Start>
		1	0.6	0	5	0	13	8	0	3	2	1E-5	28
		2	0.6	0	5	0	13	8	0	3	2	1E-5	28
		3	0.6	0	5	0	13	8	0	3	2	1E-5	28
		4	0.6	0	5	0	13	8	0	3	2	1E-5	28
		5	0.6	0	5	0	13	8	0	3	2	1E-5	28
		6	0.6	0	5	0	13	8	0	3	2	0.00074	28
		7	0.6	0.00126	5	0.02604	13	8	0	3	2	0.00222	28
		8	0.6	0.00624	5	0.04652	13	8	0	3	2	0.00716	28
		9	0.6	0.01496	5	0.06146	13	8	0	3	2	0.01518	28
		10	0.6	0.04872	5	0.10668	13	8	0	3	2	0.0291	28
		11	0.6	0.0733	5	0.17266	13	8	0	3	2	0.05218	28
		12	0.6	0.06717	5	0.30956	13	8	0	3	2	0.10943	28
	<End>
<End>
<State Association>
	DiseaseID	1	1
	StateID	28
	NumExits	4
		<Age ID>	<DW>	<Baseline Prevalence>	<TransName>	<Rate>	<ToState>	<TransName>	<Rate>	<ToState>	<TransName>	<Rate>	<ToState>	<TransName>	<Rate>	<ToState>
	<Start>
		1	0.7	0	5	0	13	8	0	3	8	0	27	8	0	26
		2	0.7	0	5	0	13	8	0	3	8	0	27	8	0	26
		3	0.7	0	5	0	13	8	0	3	8	0	27	8	0	26
		4	0.7	0	5	0	13	8	0	3	8	0	27	8	0	26
		5	0.7	0	5	0.00458	13	8	0	3	8	0	27	8	0	26
		6	0.7	0	5	0.00687	13	8	0	3	8	0	27	8	0	26
		7	0.7	0.00015	5	0.04607	13	8	0	3	8	0	27	8	0	26
		8	0.7	0.00116	5	0.07529	13	8	0	3	8	0	27	8	0	26
		9	0.7	0.00301	5	0.09453	13	8	0	3	8	0	27	8	0	26
		10	0.7	0.01318	5	0.1431	13	8	0	3	8	0	27	8	0	26
		11	0.7	0.02404	5	0.21735	13	8	0	3	8	0	27	8	0	26
		12	0.7	0.02697	5	0.39553	13	8	0	3	8	0	27	8	0	26
	<End>
<End>
<State Association>
	DiseaseID	1	2
	StateID	3
	NumExits	2
		<Age ID>	<DW>	<Baseline Prevalence>	<TransName>	<Rate>	<ToState>	<TransName>	<Rate>	<ToState>
	<Start>
		1	0.04805	0	2	0	4	2	0	2
		2	0.06205	0	2	0	4	2	0	2
		3	0.07605	0	2	0	4	2	0	2
		4	0.09005	0	2	0	4	2	0	2
		5	0.10406	0	2	2E-5	4	2	1E-5	2
		6	0.11806	0	2	2E-5	4	2	2E-5	2
		7	0.13906	0	2	0.00028	4	2	0.00036	2
		8	0.16706	0	2	0.00104	4	2	0.00116	2
		9	0.19506	0	2	0.00231	4	2	0.0024	2
		10	0.22307	0	2	0.00622	4	2	0.00708	2
		11	0.25107	0	2	0.00915	4	2	0.01312	2
		12	0.28607	0	2	0.01522	4	2	0.02694	2
	<End>
<End>
<State Association>
	DiseaseID	1	2
	StateID	4
	NumExits	3
		<Age ID>	<DW>	<Baseline Prevalence>	<TransName>	<Rate>	<ToState>	<TransName>	<Rate>	<ToState>	<TransName>	<Rate>	<ToState>
	<Start>
		1	0.8	0	5	0.60517	13	8	0	3	3	13.03571	27
		2	0.8	0	5	0.60523	13	8	0	3	3	13.03571	27
		3	0.8	0	5	0.60514	13	8	0	3	3	13.03571	27
		4	0.8	0	5	0.60504	13	8	0	3	3	13.03571	27
		5	0.8	0	5	0.57364	13	8	0	3	3	13.03571	27
		6	0.8	0	5	0.57364	13	8	0	3	3	13.03571	27
		7	0.8	0	5	0.57364	13	8	0	3	3	13.03571	27
		8	0.8	0	5	0.57627	13	8	0	3	3	13.03571	27
		9	0.8	0	5	0.58152	13	8	0	3	3	13.03571	27
		10	0.8	0	5	0.60723	13	8	0	3	3	13.03571	27
		11	0.8	0	5	0.63801	13	8	0	3	3	13.03571	27
		12	0.8	0	5	0.68646	13	8	0	3	3	13.03571	27
	<End>
<End>
<State Association>
	DiseaseID	1	2
	StateID	2
	NumExits	3
		<Age ID>	<DW>	<Baseline Prevalence>	<TransName>	<Rate>	<ToState>	<TransName>	<Rate>	<ToState>	<TransName>	<Rate>	<ToState>
	<Start>
		1	0.8	0	5	0.69329	13	8	0	3	3	13.03571	26
		2	0.8	0	5	0.63597	13	8	0	3	3	13.03571	26
		3	0.8	0	5	0.58339	13	8	0	3	3	13.03571	26
		4	0.8	0	5	0.53516	13	8	0	3	3	13.03571	26
		5	0.8	0	5	0.95	13	8	0	3	3	13.03571	26
		6	0.8	0	5	0.95	13	8	0	3	3	13.03571	26
		7	0.8	0	5	0.47288	13	8	0	3	3	13.03571	26
		8	0.8	0	5	0.2093	13	8	0	3	3	13.03571	26
		9	0.8	0	5	0.20928	13	8	0	3	3	13.03571	26
		10	0.8	0	5	0.22122	13	8	0	3	3	13.03571	26
		11	0.8	0	5	0.26906	13	8	0	3	3	13.03571	26
		12	0.8	0	5	0.35458	13	8	0	3	3	13.03571	26
	<End>
<End>
<State Association>
	DiseaseID	1	2
	StateID	27
	NumExits	3
		<Age ID>	<DW>	<Baseline Prevalence>	<TransName>	<Rate>	<ToState>	<TransName>	<Rate>	<ToState>	<TransName>	<Rate>	<ToState>
	<Start>
		1	0.6	0	5	9E-5	13	8	0	3	2	1E-5	28
		2	0.6	0	5	0.00024	13	8	0	3	2	1E-5	28
		3	0.6	0	5	0.00064	13	8	0	3	2	1E-5	28
		4	0.6	0	5	0.00167	13	8	0	3	2	1E-5	28
		5	0.6	1E-5	5	0.00251	13	8	0	3	2	1E-5	28
		6	0.6	1E-5	5	0.00376	13	8	0	3	2	0.00029	28
		7	0.6	0.00043	5	0.01374	13	8	0	3	2	0.00087	28
		8	0.6	0.00157	5	0.02336	13	8	0	3	2	0.00275	28
		9	0.6	0.00343	5	0.03265	13	8	0	3	2	0.0067	28
		10	0.6	0.01097	5	0.04538	13	8	0	3	2	0.01511	28
		11	0.6	0.01884	5	0.0611	13	8	0	3	2	0.02908	28
		12	0.6	0.02253	5	0.11892	13	8	0	3	2	0.05792	28
	<End>
<End>
<State Association>
	DiseaseID	1	2
	StateID	26
	NumExits	3
		<Age ID>	<DW>	<Baseline Prevalence>	<TransName>	<Rate>	<ToState>	<TransName>	<Rate>	<ToState>	<TransName>	<Rate>	<ToState>
	<Start>
		1	0.6	0	5	0	13	8	0	3	2	1E-5	28
		2	0.6	0	5	0	13	8	0	3	2	1E-5	28
		3	0.6	0	5	0	13	8	0	3	2	1E-5	28
		4	0.6	0	5	0	13	8	0	3	2	1E-5	28
		5	0.6	0	5	0	13	8	0	3	2	1E-5	28
		6	0.6	0	5	0	13	8	0	3	2	0.00074	28
		7	0.6	0.00148	5	0.01616	13	8	0	3	2	0.00222	28
		8	0.6	0.00598	5	0.03196	13	8	0	3	2	0.00716	28
		9	0.6	0.01348	5	0.04742	13	8	0	3	2	0.01518	28
		10	0.6	0.03588	5	0.09108	13	8	0	3	2	0.0291	28
		11	0.6	0.05348	5	0.15854	13	8	0	3	2	0.05218	28
		12	0.6	0.0562	5	0.31968	13	8	0	3	2	0.10943	28
	<End>
<End>
<State Association>
	DiseaseID	1	2
	StateID	28
	NumExits	4
		<Age ID>	<DW>	<Baseline Prevalence>	<TransName>	<Rate>	<ToState>	<TransName>	<Rate>	<ToState>	<TransName>	<Rate>	<ToState>	<TransName>	<Rate>	<ToState>
	<Start>
		1	0.7	0	5	0	13	8	0	3	8	0	27	8	0	26
		2	0.7	0	5	0	13	8	0	3	8	0	27	8	0	26
		3	0.7	0	5	0	13	8	0	3	8	0	27	8	0	26
		4	0.7	0	5	0	13	8	0	3	8	0	27	8	0	26
		5	0.7	0	5	0.00251	13	8	0	3	8	0	27	8	0	26
		6	0.7	0	5	0.00376	13	8	0	3	8	0	27	8	0	26
		7	0.7	0.00015	5	0.02959	13	8	0	3	8	0	27	8	0	26
		8	0.7	0.00116	5	0.05451	13	8	0	3	8	0	27	8	0	26
		9	0.7	0.00301	5	0.07852	13	8	0	3	8	0	27	8	0	26
		10	0.7	0.01318	5	0.13233	13	8	0	3	8	0	27	8	0	26
		11	0.7	0.02404	5	0.20995	13	8	0	3	8	0	27	8	0	26
		12	0.7	0.02697	5	0.40059	13	8	0	3	8	0	27	8	0	26
	<End>
<End>
<State Association>
	DiseaseID	16	1
	StateID	3
	NumExits	2
		<Age ID>	<DW>	<Baseline Prevalence>	<TransName>	<Rate>	<ToState>	<TransName>	<Rate>	<ToState>
	<Start>
		1	0.04596	0	2	0	54	3	0	24
		2	0.06118	0	2	0	54	3	0	24
		3	0.0764	0	2	0	54	3	0	24
		4	0.09162	0	2	0.0001	54	3	0	24
		5	0.10685	0	2	0.0005	54	3	0	24
		6	0.12207	0	2	0.0014	54	3	0	24
		7	0.1449	0	2	0.0026	54	3	0	24
		8	0.17535	0	2	0.0047	54	3	0	24
		9	0.2058	0	2	0.0056	54	3	0	24
		10	0.23624	0	2	0.0037	54	3	0	24
		11	0.26669	0	2	0.0087	54	3	0	24
		12	0.30474	0	2	0.0187	54	3	0	24
	<End>
<End>
<State Association>
	DiseaseID	16	1
	StateID	54
	NumExits	3
		<Age ID>	<DW>	<Baseline Prevalence>	<TransName>	<Rate>	<ToState>	<TransName>	<Rate>	<ToState>	<TransName>	<Rate>	<ToState>
	<Start>
		1	0.031	0	5	0	13	2	0	55	2	0	56
		2	0.031	0	5	0	13	2	0	55	2	0	56
		3	0.031	0.0161	5	0	13	2	0	55	2	0.0001	56
		4	0.031	0.0163	5	0	13	2	0	55	2	0.00217	56
		5	0.031	0.0175	5	0.001	13	2	0.00025	55	2	0.00592	56
		6	0.031	0.0218	5	0.0041	13	2	0.00105	55	2	0.01018	56
		7	0.031	0.0359	5	0.0083	13	2	0.00627	55	2	0.01266	56
		8	0.031	0.0652	5	0.0097	13	2	0.00706	55	2	0.00343	56
		9	0.031	0.1055	5	0.0137	13	2	0.00912	55	2	0.00146	56
		10	0.031	0.13	5	0.0171	13	2	0.01689	55	2	0.01119	56
		11	0.031	0.1446	5	0.0248	13	2	0.01935	55	2	0.02684	56
		12	0.031	0.2375	5	0.0378	13	2	0.01728	55	2	0.02951	56
	<End>
<End>
<State Association>
	DiseaseID	16	1
	StateID	55
	NumExits	1
		<Age ID>	<DW>	<Baseline Prevalence>	<TransName>	<Rate>	<ToState>
	<Start>
		1	0.338	0	5	0	13
		2	0.338	0	5	0	13
		3	0.338	0	5	0	13
		4	0.338	0	5	0.0001	13
		5	0.338	0.0004	5	0.0013	13
		6	0.338	0.0004	5	0.0062	13
		7	0.338	0.0012	5	0.0168	13
		8	0.338	0.0043	5	0.0195	13
		9	0.338	0.0092	5	0.0277	13
		10	0.338	0.0202	5	0.0349	13
		11	0.338	0.034	5	0.0491	13
		12	0.338	0.0462	5	0.0749	13
	<End>
<End>
<State Association>
	DiseaseID	16	1
	StateID	56
	NumExits	1
		<Age ID>	<DW>	<Baseline Prevalence>	<TransName>	<Rate>	<ToState>
	<Start>
		1	0.164	0	5	0	13
		2	0.164	0	5	0	13
		3	0.164	0	5	0	13
		4	0.164	0.0001	5	0	13
		5	0.164	0.0004	5	0.0014	13
		6	0.164	0.0012	5	0.0064	13
		7	0.164	0.0038	5	0.0166	13
		8	0.164	0.0065	5	0.0193	13
		9	0.164	0.0063	5	0.0273	13
		10	0.164	0.0109	5	0.0352	13
		11	0.164	0.027	5	0.0494	13
		12	0.164	0.0629	5	0.0761	13
	<End>
<End>
<State Association>
	DiseaseID	16	1
	StateID	24
	NumExits	1
		<Age ID>	<DW>	<Baseline Prevalence>	<TransName>	<Rate>	<ToState>
	<Start>
		1	0	0	5	0	13
		2	0	0	5	0	13
		3	0	0	5	0	13
		4	0	0	5	0	13
		5	0	0	5	0	13
		6	0	0	5	0	13
		7	0	0	5	0	13
		8	0	0	5	0	13
		9	0	0	5	0	13
		10	0	0	5	0	13
		11	0	0	5	0	13
		12	0	0	5	0	13
	<End>
<End>
<State Association>
	DiseaseID	16	2
	StateID	3
	NumExits	2
		<Age ID>	<DW>	<Baseline Prevalence>	<TransName>	<Rate>	<ToState>	<TransName>	<Rate>	<ToState>
	<Start>
		1	0.04805	0	2	0	54	3	0	24
		2	0.06205	0	2	0	54	3	0	24
		3	0.07605	0	2	0	54	3	0	24
		4	0.09005	0	2	0.0001	54	3	0	24
		5	0.10406	0	2	0.0005	54	3	0	24
		6	0.11806	0	2	0.0013	54	3	0	24
		7	0.13906	0	2	0.0025	54	3	0	24
		8	0.16706	0	2	0.0045	54	3	0	24
		9	0.19506	0	2	0.0052	54	3	0	24
		10	0.22307	0	2	0.0032	54	3	0	24
		11	0.25107	0	2	0.0083	54	3	0	24
		12	0.28607	0	2	0.0167	54	3	0	24
	<End>
<End>
<State Association>
	DiseaseID	16	2
	StateID	54
	NumExits	3
		<Age ID>	<DW>	<Baseline Prevalence>	<TransName>	<Rate>	<ToState>	<TransName>	<Rate>	<ToState>	<TransName>	<Rate>	<ToState>
	<Start>
		1	0.031	0.0166	5	0	13	2	0	55	2	0	56
		2	0.031	0.0166	5	0	13	2	0	55	2	0	56
		3	0.031	0.0166	5	0	13	2	0.0064	55	2	6E-5	56
		4	0.031	0.0168	5	0	13	2	0.00746	55	2	0.00106	56
		5	0.031	0.0181	5	0.0005	13	2	0.00138	55	2	0.00328	56
		6	0.031	0.0224	5	0.0022	13	2	0.00189	55	2	0.00642	56
		7	0.031	0.0364	5	0.0048	13	2	0.00938	55	2	0.00756	56
		8	0.031	0.0655	5	0.0063	13	2	0.0083	55	2	0.00174	56
		9	0.031	0.1063	5	0.0089	13	2	0.01107	55	2	0.00066	56
		10	0.031	0.1325	5	0.0116	13	2	0.0206	55	2	0.00665	56
		11	0.031	0.1487	5	0.0178	13	2	0.02375	55	2	0.01608	56
		12	0.031	0.2506	5	0.026	13	2	0.01911	55	2	0.01507	56
	<End>
<End>
<State Association>
	DiseaseID	16	2
	StateID	55
	NumExits	1
		<Age ID>	<DW>	<Baseline Prevalence>	<TransName>	<Rate>	<ToState>
	<Start>
		1	0.338	0	5	0	13
		2	0.338	0	5	0	13
		3	0.338	0.0004	5	0	13
		4	0.338	0.0011	5	0.0001	13
		5	0.338	0.0014	5	0.0007	13
		6	0.338	0.0015	5	0.0033	13
		7	0.338	0.0028	5	0.0097	13
		8	0.338	0.007	5	0.0126	13
		9	0.338	0.0132	5	0.018	13
		10	0.338	0.0281	5	0.0238	13
		11	0.338	0.0481	5	0.0353	13
		12	0.338	0.0698	5	0.0523	13
	<End>
<End>
<State Association>
	DiseaseID	16	2
	StateID	56
	NumExits	1
		<Age ID>	<DW>	<Baseline Prevalence>	<TransName>	<Rate>	<ToState>
	<Start>
		1	0.164	0	5	0	13
		2	0.164	0	5	0	13
		3	0.164	0	5	0	13
		4	0.164	0	5	0	13
		5	0.164	0.0002	5	0.0007	13
		6	0.164	0.0007	5	0.0035	13
		7	0.164	0.0024	5	0.0097	13
		8	0.164	0.0041	5	0.0125	13
		9	0.164	0.004	5	0.0178	13
		10	0.164	0.007	5	0.0241	13
		11	0.164	0.018	5	0.0356	13
		12	0.164	0.0425	5	0.0529	13
	<End>
<End>
<State Association>
	DiseaseID	16	2
	StateID	24
	NumExits	1
		<Age ID>	<DW>	<Baseline Prevalence>	<TransName>	<Rate>	<ToState>
	<Start>
		1	0	0	5	0	13
		2	0	0	5	0	13
		3	0	0	5	0	13
		4	0	0	5	0	13
		5	0	0	5	0	13
		6	0	0	5	0	13
		7	0	0	5	0	13
		8	0	0	5	0	13
		9	0	0	5	0	13
		10	0	0	5	0	13
		11	0	0	5	0	13
		12	0	0	5	0	13
	<End>
<End>
<State Association>
	DiseaseID	4	1
	StateID	3
	NumExits	2
		<Age ID>	<DW>	<Baseline Prevalence>	<TransName>	<Rate>	<ToState>	<TransName>	<Rate>	<ToState>
	<Start>
		1	0.04596	0	2	8E-5	20	3	0	24
		2	0.06118	0	2	0.04041	20	3	0	24
		3	0.0764	0	2	0.06571	20	3	0	24
		4	0.09162	0	2	0.07404	20	3	0	24
		5	0.10685	0	2	0.08159	20	3	0	24
		6	0.12207	0	2	0.08735	20	3	0	24
		7	0.1449	0	2	0.09438	20	3	0	24
		8	0.17535	0	2	0.09859	20	3	0	24
		9	0.2058	0	2	0.09518	20	3	0	24
		10	0.23624	0	2	0.07907	20	3	0	24
		11	0.26669	0	2	0.08273	20	3	0	24
		12	0.30474	0	2	0.08386	20	3	0	24
	<End>
<End>
<State Association>
	DiseaseID	4	1
	StateID	20
	NumExits	2
		<Age ID>	<DW>	<Baseline Prevalence>	<TransName>	<Rate>	<ToState>	<TransName>	<Rate>	<ToState>
	<Start>
		1	0.37	0.0043	5	0.00512	13	8	1.57734	3
		2	0.37	0.02021	5	0.00287	13	8	1.6012	3
		3	0.37	0.0336	5	0.00405	13	8	1.59487	3
		4	0.37	0.03897	5	0.00683	13	8	1.57346	3
		5	0.37	0.04294	5	0.0073	13	8	1.5664	3
		6	0.37	0.04598	5	0.00611	13	8	1.57026	3
		7	0.37	0.04967	5	0.00582	13	8	1.57246	3
		8	0.37	0.05189	5	0.00647	13	8	1.56783	3
		9	0.37	0.0501	5	0.00831	13	8	1.56406	3
		10	0.37	0.04162	5	0.01283	13	8	1.56714	3
		11	0.37	0.04354	5	0.02933	13	8	1.55329	3
		12	0.37	0.04414	5	0.04883	13	8	1.54818	3
	<End>
<End>
<State Association>
	DiseaseID	4	1
	StateID	24
	NumExits	1
		<Age ID>	<DW>	<Baseline Prevalence>	<TransName>	<Rate>	<ToState>
	<Start>
		1	0	0	5	0	13
		2	0	0	5	0	13
		3	0	0	5	0	13
		4	0	0	5	0	13
		5	0	0	5	0	13
		6	0	0	5	0	13
		7	0	0	5	0	13
		8	0	0	5	0	13
		9	0	0	5	0	13
		10	0	0	5	0	13
		11	0	0	5	0	13
		12	0	0	5	0	13
	<End>
<End>
<State Association>
	DiseaseID	4	2
	StateID	24
	NumExits	1
		<Age ID>	<DW>	<Baseline Prevalence>	<TransName>	<Rate>	<ToState>
	<Start>
		1	0	0	5	0	13
		2	0	0	5	0	13
		3	0	0	5	0	13
		4	0	0	5	0	13
		5	0	0	5	0	13
		6	0	0	5	0	13
		7	0	0	5	0	13
		8	0	0	5	0	13
		9	0	0	5	0	13
		10	0	0	5	0	13
		11	0	0	5	0	13
		12	0	0	5	0	13
	<End>
<End>
<State Association>
	DiseaseID	4	2
	StateID	3
	NumExits	2
		<Age ID>	<DW>	<Baseline Prevalence>	<TransName>	<Rate>	<ToState>	<TransName>	<Rate>	<ToState>
	<Start>
		1	0.04805	0	2	0.00014	20	3	0	24
		2	0.06205	0	2	0.06812	20	3	0	24
		3	0.07605	0	2	0.11049	20	3	0	24
		4	0.09005	0	2	0.11718	20	3	0	24
		5	0.10406	0	2	0.12062	20	3	0	24
		6	0.11806	0	2	0.13362	20	3	0	24
		7	0.13906	0	2	0.15286	20	3	0	24
		8	0.16706	0	2	0.16627	20	3	0	24
		9	0.19506	0	2	0.16146	20	3	0	24
		10	0.22307	0	2	0.13457	20	3	0	24
		11	0.25107	0	2	0.14116	20	3	0	24
		12	0.28607	0	2	0.14286	20	3	0	24
	<End>
<End>
<State Association>
	DiseaseID	4	2
	StateID	20
	NumExits	2
		<Age ID>	<DW>	<Baseline Prevalence>	<TransName>	<Rate>	<ToState>	<TransName>	<Rate>	<ToState>
	<Start>
		1	0.37	0.00729	5	0.0034	13	8	1.58389	3
		2	0.37	0.03406	5	0.00186	13	8	1.60057	3
		3	0.37	0.05649	5	0.00186	13	8	1.5943	3
		4	0.37	0.06166	5	0.00279	13	8	1.57632	3
		5	0.37	0.06349	5	0.0033	13	8	1.56966	3
		6	0.37	0.07032	5	0.00352	13	8	1.57214	3
		7	0.37	0.08046	5	0.00479	13	8	1.5746	3
		8	0.37	0.0875	5	0.00629	13	8	1.57216	3
		9	0.37	0.08498	5	0.00838	13	8	1.56968	3
		10	0.37	0.07083	5	0.01305	13	8	1.56927	3
		11	0.37	0.07429	5	0.02933	13	8	1.55172	3
		12	0.37	0.07519	5	0.04896	13	8	1.5436	3
	<End>
<End>
<State Association>
	DiseaseID	12	2
	StateID	24
	NumExits	1
		<Age ID>	<DW>	<Baseline Prevalence>	<TransName>	<Rate>	<ToState>
	<Start>
		1	0	0	5	0	13
		2	0	0	5	0	13
		3	0	0	5	0	13
		4	0	0	5	0	13
		5	0	0	5	0	13
		6	0	0	5	0	13
		7	0	0	5	0	13
		8	0	0	5	0	13
		9	0	0	5	0	13
		10	0	0	5	0	13
		11	0	0	5	0	13
		12	0	0	5	0	13
	<End>
<End>
<State Association>
	DiseaseID	12	2
	StateID	3
	NumExits	2
		<Age ID>	<DW>	<Baseline Prevalence>	<TransName>	<Rate>	<ToState>	<TransName>	<Rate>	<ToState>
	<Start>
		1	0.04805	0	2	0	49	3	0	24
		2	0.06205	0	2	0	49	3	0	24
		3	0.07605	0	2	0	49	3	0	24
		4	0.09005	0	2	0.00908	49	3	0	24
		5	0.10406	0	2	0.01902	49	3	0	24
		6	0.11806	0	2	0.01561	49	3	0	24
		7	0.13906	0	2	0.00752	49	3	0	24
		8	0.16706	0	2	0.00083	49	3	0	24
		9	0.19506	0	2	0	49	3	0	24
		10	0.22307	0	2	0	49	3	0	24
		11	0.25107	0	2	0	49	3	0	24
		12	0.28607	0	2	0	49	3	0	24
	<End>
<End>
<State Association>
	DiseaseID	12	2
	StateID	49
	NumExits	2
		<Age ID>	<DW>	<Baseline Prevalence>	<TransName>	<Rate>	<ToState>	<TransName>	<Rate>	<ToState>
	<Start>
		1	0.37	0	5	0	13	8	0	3
		2	0.37	0	5	0	13	8	0	3
		3	0.37	0	5	0	13	8	0	3
		4	0.37	0.00398	5	0.00279	13	8	1.57632	3
		5	0.37	0.00922	5	0.0033	13	8	1.56966	3
		6	0.37	0.00817	5	0.00352	13	8	1.57214	3
		7	0.37	0.00424	5	0.00479	13	8	1.5746	3
		8	0.37	0.00049	5	0.00629	13	8	1.57216	3
		9	0.37	0	5	0.00838	13	8	1.56968	3
		10	0.37	0	5	0.01305	13	8	1.56927	3
		11	0.37	0	5	0.02933	13	8	1.55172	3
		12	0.37	0	5	0.04896	13	8	1.5436	3
	<End>
<End>
<State Association>
	DiseaseID	15	1
	StateID	3
	NumExits	2
		<Age ID>	<DW>	<Baseline Prevalence>	<TransName>	<Rate>	<ToState>	<TransName>	<Rate>	<ToState>
	<Start>
		1	0.04596	0	2	0	53	3	0	24
		2	0.06118	0	2	0.00526	53	3	0	24
		3	0.0764	0	2	0.00984	53	3	0	24
		4	0.09162	0	2	0.01044	53	3	0	24
		5	0.10685	0	2	0.00884	53	3	0	24
		6	0.12207	0	2	0.00844	53	3	0	24
		7	0.1449	0	2	0.00783	53	3	0	24
		8	0.17535	0	2	0.00742	53	3	0	24
		9	0.2058	0	2	0.00622	53	3	0	24
		10	0.23624	0	2	0.00544	53	3	0	24
		11	0.26669	0	2	0.00492	53	3	0	24
		12	0.30474	0	2	0.0045	53	3	0	24
	<End>
<End>
<State Association>
	DiseaseID	15	1
	StateID	53
	NumExits	2
		<Age ID>	<DW>	<Baseline Prevalence>	<TransName>	<Rate>	<ToState>	<TransName>	<Rate>	<ToState>
	<Start>
		1	0.16	0	5	0	13	8	0.1416	3
		2	0.16	0.01288	5	0	13	8	0.14056	3
		3	0.16	0.03408	5	0	13	8	0.14016	3
		4	0.16	0.05322	5	0	13	8	0.14006	3
		5	0.16	0.05851	5	0	13	8	0.14	3
		6	0.16	0.05777	5	0	13	8	0.14	3
		7	0.16	0.05504	5	0	13	8	0.14	3
		8	0.16	0.05224	5	0	13	8	0.14	3
		9	0.16	0.04685	5	0	13	8	0.14	3
		10	0.16	0.04128	5	0	13	8	0.14	3
		11	0.16	0.03653	5	0	13	8	0.14	3
		12	0.16	0.0323	5	0	13	8	0.14	3
	<End>
<End>
<State Association>
	DiseaseID	15	1
	StateID	24
	NumExits	1
		<Age ID>	<DW>	<Baseline Prevalence>	<TransName>	<Rate>	<ToState>
	<Start>
		1	0	0	5	0	13
		2	0	0	5	0	13
		3	0	0	5	0	13
		4	0	0	5	0	13
		5	0	0	5	0	13
		6	0	0	5	0	13
		7	0	0	5	0	13
		8	0	0	5	0	13
		9	0	0	5	0	13
		10	0	0	5	0	13
		11	0	0	5	0	13
		12	0	0	5	0	13
	<End>
<End>
<State Association>
	DiseaseID	15	2
	StateID	3
	NumExits	2
		<Age ID>	<DW>	<Baseline Prevalence>	<TransName>	<Rate>	<ToState>	<TransName>	<Rate>	<ToState>
	<Start>
		1	0.04805	0	2	0	53	3	0	24
		2	0.06205	0	2	0.00824	53	3	0	24
		3	0.07605	0	2	0.0153	53	3	0	24
		4	0.09005	0	2	0.01606	53	3	0	24
		5	0.10406	0	2	0.01333	53	3	0	24
		6	0.11806	0	2	0.01267	53	3	0	24
		7	0.13906	0	2	0.01184	53	3	0	24
		8	0.16706	0	2	0.01132	53	3	0	24
		9	0.19506	0	2	0.00967	53	3	0	24
		10	0.22307	0	2	0.00827	53	3	0	24
		11	0.25107	0	2	0.00754	53	3	0	24
		12	0.28607	0	2	0.0068	53	3	0	24
	<End>
<End>
<State Association>
	DiseaseID	15	2
	StateID	53
	NumExits	2
		<Age ID>	<DW>	<Baseline Prevalence>	<TransName>	<Rate>	<ToState>	<TransName>	<Rate>	<ToState>
	<Start>
		1	0.16	0	5	0	13	8	0.1416	3
		2	0.16	0.02012	5	0	13	8	0.14056	3
		3	0.16	0.0525	5	0	13	8	0.14016	3
		4	0.16	0.08064	5	0	13	8	0.14006	3
		5	0.16	0.08745	5	0	13	8	0.14	3
		6	0.16	0.08559	5	0	13	8	0.14	3
		7	0.16	0.08131	5	0	13	8	0.14	3
		8	0.16	0.07759	5	0	13	8	0.14	3
		9	0.16	0.07016	5	0	13	8	0.14	3
		10	0.16	0.06192	5	0	13	8	0.14	3
		11	0.16	0.05466	5	0	13	8	0.14	3
		12	0.16	0.0482	5	0	13	8	0.14	3
	<End>
<End>
<State Association>
	DiseaseID	15	2
	StateID	24
	NumExits	1
		<Age ID>	<DW>	<Baseline Prevalence>	<TransName>	<Rate>	<ToState>
	<Start>
		1	0	0	5	0	13
		2	0	0	5	0	13
		3	0	0	5	0	13
		4	0	0	5	0	13
		5	0	0	5	0	13
		6	0	0	5	0	13
		7	0	0	5	0	13
		8	0	0	5	0	13
		9	0	0	5	0	13
		10	0	0	5	0	13
		11	0	0	5	0	13
		12	0	0	5	0	13
	<End>
<End>
<State Association>
	DiseaseID	3	1
	StateID	3
	NumExits	2
		<Age ID>	<DW>	<Baseline Prevalence>	<TransName>	<Rate>	<ToState>	<TransName>	<Rate>	<ToState>
	<Start>
		1	0.04596	0	2	0	19	3	0	24
		2	0.06118	0	2	0	19	3	0	24
		3	0.0764	0	2	0.00012	19	3	0	24
		4	0.09162	0	2	0.00042	19	3	0	24
		5	0.10685	0	2	0.00055	19	3	0	24
		6	0.12207	0	2	0.00041	19	3	0	24
		7	0.1449	0	2	0.0003	19	3	0	24
		8	0.17535	0	2	0.00011	19	3	0	24
		9	0.2058	0	2	0.0001	19	3	0	24
		10	0.23624	0	2	0.00019	19	3	0	24
		11	0.26669	0	2	0.00039	19	3	0	24
		12	0.30474	0	2	0.0008	19	3	0	24
	<End>
<End>
<State Association>
	DiseaseID	3	1
	StateID	19
	NumExits	2
		<Age ID>	<DW>	<Baseline Prevalence>	<TransName>	<Rate>	<ToState>	<TransName>	<Rate>	<ToState>
	<Start>
		1	0.6	0	5	0.00017	13	8	0.0001	3
		2	0.6	4E-5	5	0.00194	13	8	0.00102	3
		3	0.6	0.00034	5	0.00618	13	8	0.00318	3
		4	0.6	0.00158	5	0.01022	13	8	0.00588	3
		5	0.6	0.0037	5	0.01184	13	8	0.00843	3
		6	0.6	0.0057	5	0.01244	13	8	0.01077	3
		7	0.6	0.00751	5	0.01412	13	8	0.01195	3
		8	0.6	0.0076	5	0.01895	13	8	0.01181	3
		9	0.6	0.00624	5	0.03313	13	8	0.0099	3
		10	0.6	0.00468	5	0.05743	13	8	0.00648	3
		11	0.6	0.00375	5	0.11428	13	8	0.0044	3
		12	0.6	0.0029	5	0.2664	13	8	0.004	3
	<End>
<End>
<State Association>
	DiseaseID	3	1
	StateID	24
	NumExits	1
		<Age ID>	<DW>	<Baseline Prevalence>	<TransName>	<Rate>	<ToState>
	<Start>
		1	0	0	5	0	13
		2	0	0	5	0	13
		3	0	0	5	0	13
		4	0	0	5	0	13
		5	0	0	5	0	13
		6	0	0	5	0	13
		7	0	0	5	0	13
		8	0	0	5	0	13
		9	0	0	5	0	13
		10	0	0	5	0	13
		11	0	0	5	0	13
		12	0	0	5	0	13
	<End>
<End>
<State Association>
	DiseaseID	3	2
	StateID	3
	NumExits	2
		<Age ID>	<DW>	<Baseline Prevalence>	<TransName>	<Rate>	<ToState>	<TransName>	<Rate>	<ToState>
	<Start>
		1	0.04805	0	2	0	19	3	0	24
		2	0.06205	0	2	0	19	3	0	24
		3	0.07605	0	2	8E-5	19	3	0	24
		4	0.09005	0	2	0.00032	19	3	0	24
		5	0.10406	0	2	0.00045	19	3	0	24
		6	0.11806	0	2	0.00031	19	3	0	24
		7	0.13906	0	2	0.0002	19	3	0	24
		8	0.16706	0	2	1E-5	19	3	0	24
		9	0.19506	0	2	0	19	3	0	24
		10	0.22307	0	2	0	19	3	0	24
		11	0.25107	0	2	0.0001	19	3	0	24
		12	0.28607	0	2	0.0002	19	3	0	24
	<End>
<End>
<State Association>
	DiseaseID	3	2
	StateID	19
	NumExits	2
		<Age ID>	<DW>	<Baseline Prevalence>	<TransName>	<Rate>	<ToState>	<TransName>	<Rate>	<ToState>
	<Start>
		1	0.6	0	5	0.0001	13	8	0.0002	3
		2	0.6	4E-5	5	0.00098	13	8	0.00196	3
		3	0.6	0.00026	5	0.00292	13	8	0.00596	3
		4	0.6	0.00122	5	0.00458	13	8	0.01042	3
		5	0.6	0.00291	5	0.00511	13	8	0.01385	3
		6	0.6	0.00445	5	0.00537	13	8	0.01671	3
		7	0.6	0.00564	5	0.00654	13	8	0.01795	3
		8	0.6	0.00551	5	0.00926	13	8	0.018	3
		9	0.6	0.00441	5	0.01628	13	8	0.01673	3
		10	0.6	0.00316	5	0.02752	13	8	0.01224	3
		11	0.6	0.00244	5	0.05679	13	8	0.00782	3
		12	0.6	0.0018	5	0.1183	13	8	0.0061	3
	<End>
<End>
<State Association>
	DiseaseID	3	2
	StateID	24
	NumExits	1
		<Age ID>	<DW>	<Baseline Prevalence>	<TransName>	<Rate>	<ToState>
	<Start>
		1	0	0	5	0	13
		2	0	0	5	0	13
		3	0	0	5	0	13
		4	0	0	5	0	13
		5	0	0	5	0	13
		6	0	0	5	0	13
		7	0	0	5	0	13
		8	0	0	5	0	13
		9	0	0	5	0	13
		10	0	0	5	0	13
		11	0	0	5	0	13
		12	0	0	5	0	13
	<End>
<End>
<State Association>
	DiseaseID	9	1
	StateID	3
	NumExits	2
		<Age ID>	<DW>	<Baseline Prevalence>	<TransName>	<Rate>	<ToState>	<TransName>	<Rate>	<ToState>
	<Start>
		1	0.04596	0	2	0	46	3	0	24
		2	0.06118	0	2	4E-5	46	3	0	24
		3	0.0764	0	2	0.00042	46	3	0	24
		4	0.09162	0	2	0.00126	46	3	0	24
		5	0.10685	0	2	0.00148	46	3	0	24
		6	0.12207	0	2	0.00068	46	3	0	24
		7	0.1449	0	2	0.00022	46	3	0	24
		8	0.17535	0	2	1E-5	46	3	0	24
		9	0.2058	0	2	0	46	3	0	24
		10	0.23624	0	2	0	46	3	0	24
		11	0.26669	0	2	0.00019	46	3	0	24
		12	0.30474	0	2	0.0004	46	3	0	24
	<End>
<End>
<State Association>
	DiseaseID	9	1
	StateID	46
	NumExits	2
		<Age ID>	<DW>	<Baseline Prevalence>	<TransName>	<Rate>	<ToState>	<TransName>	<Rate>	<ToState>
	<Start>
		1	0.31	3E-5	5	0	13	8	0	3
		2	0.31	0.00022	5	0.00012	13	8	0.00012	3
		3	0.31	0.00116	5	0.00206	13	8	0.00166	3
		4	0.31	0.0051	5	0.00638	13	8	0.00506	3
		5	0.31	0.01103	5	0.00906	13	8	0.00726	3
		6	0.31	0.01537	5	0.00946	13	8	0.00766	3
		7	0.31	0.01628	5	0.01064	13	8	0.0077	3
		8	0.31	0.01449	5	0.01478	13	8	0.00779	3
		9	0.31	0.01114	5	0.02966	13	8	0.0078	3
		10	0.31	0.00654	5	0.06275	13	8	0.0078	3
		11	0.31	0.00326	5	0.11646	13	8	0.00771	3
		12	0.31	0.0017	5	0.2658	13	8	0.0077	3
	<End>
<End>
<State Association>
	DiseaseID	9	1
	StateID	24
	NumExits	1
		<Age ID>	<DW>	<Baseline Prevalence>	<TransName>	<Rate>	<ToState>
	<Start>
		1	0	0	5	0	13
		2	0	0	5	0	13
		3	0	0	5	0	13
		4	0	0	5	0	13
		5	0	0	5	0	13
		6	0	0	5	0	13
		7	0	0	5	0	13
		8	0	0	5	0	13
		9	0	0	5	0	13
		10	0	0	5	0	13
		11	0	0	5	0	13
		12	0	0	5	0	13
	<End>
<End>
<State Association>
	DiseaseID	9	2
	StateID	3
	NumExits	2
		<Age ID>	<DW>	<Baseline Prevalence>	<TransName>	<Rate>	<ToState>	<TransName>	<Rate>	<ToState>
	<Start>
		1	0.04805	0	2	0	46	3	0	24
		2	0.06205	0	2	4E-5	46	3	0	24
		3	0.07605	0	2	0.00054	46	3	0	24
		4	0.09005	0	2	0.00156	46	3	0	24
		5	0.10406	0	2	0.0017	46	3	0	24
		6	0.11806	0	2	0.0007	46	3	0	24
		7	0.13906	0	2	0.00013	46	3	0	24
		8	0.16706	0	2	1E-5	46	3	0	24
		9	0.19506	0	2	0	46	3	0	24
		10	0.22307	0	2	0	46	3	0	24
		11	0.25107	0	2	0.0001	46	3	0	24
		12	0.28607	0	2	0.0003	46	3	0	24
	<End>
<End>
<State Association>
	DiseaseID	9	2
	StateID	46
	NumExits	2
		<Age ID>	<DW>	<Baseline Prevalence>	<TransName>	<Rate>	<ToState>	<TransName>	<Rate>	<ToState>
	<Start>
		1	0.31	3E-5	5	0	13	8	0	3
		2	0.31	0.00022	5	8E-5	13	8	8E-5	3
		3	0.31	0.0014	5	0.0012	13	8	0.0016	3
		4	0.31	0.00638	5	0.00366	13	8	0.00506	3
		5	0.31	0.0136	5	0.00518	13	8	0.00726	3
		6	0.31	0.0186	5	0.00538	13	8	0.00766	3
		7	0.31	0.0192	5	0.00654	13	8	0.0077	3
		8	0.31	0.01721	5	0.00974	13	8	0.00779	3
		9	0.31	0.01402	5	0.02076	13	8	0.00789	3
		10	0.31	0.00915	5	0.05222	13	8	0.0079	3
		11	0.31	0.00443	5	0.0937	13	8	0.00781	3
		12	0.31	0.0018	5	0.1772	13	8	0.0077	3
	<End>
<End>
<State Association>
	DiseaseID	9	2
	StateID	24
	NumExits	1
		<Age ID>	<DW>	<Baseline Prevalence>	<TransName>	<Rate>	<ToState>
	<Start>
		1	0	0	5	0	13
		2	0	0	5	0	13
		3	0	0	5	0	13
		4	0	0	5	0	13
		5	0	0	5	0	13
		6	0	0	5	0	13
		7	0	0	5	0	13
		8	0	0	5	0	13
		9	0	0	5	0	13
		10	0	0	5	0	13
		11	0	0	5	0	13
		12	0	0	5	0	13
	<End>
<End>
<State Association>
	DiseaseID	5	1
	StateID	3
	NumExits	2
		<Age ID>	<DW>	<Baseline Prevalence>	<TransName>	<Rate>	<ToState>	<TransName>	<Rate>	<ToState>
	<Start>
		1	0.04596	0	2	0.00141	21	3	0	24
		2	0.06118	0	2	0.00109	21	3	0	24
		3	0.0764	0	2	0.00093	21	3	0	24
		4	0.09162	0	2	0.00087	21	3	0	24
		5	0.10685	0	2	0.00077	21	3	0	24
		6	0.12207	0	2	0.00064	21	3	0	24
		7	0.1449	0	2	0.00057	21	3	0	24
		8	0.17535	0	2	0.00065	21	3	0	24
		9	0.2058	0	2	0.00079	21	3	0	24
		10	0.23624	0	2	0.00121	21	3	0	24
		11	0.26669	0	2	0.00168	21	3	0	24
		12	0.30474	0	2	0.00202	21	3	0	24
	<End>
<End>
<State Association>
	DiseaseID	5	1
	StateID	21
	NumExits	2
		<Age ID>	<DW>	<Baseline Prevalence>	<TransName>	<Rate>	<ToState>	<TransName>	<Rate>	<ToState>
	<Start>
		1	0.32	0.00573	5	0.00481	13	8	0.18989	3
		2	0.32	0.00721	5	0.00273	13	8	0.11356	3
		3	0.32	0.00846	5	0.00312	13	8	0.08651	3
		4	0.32	0.00901	5	0.00512	13	8	0.09123	3
		5	0.32	0.00898	5	0.00658	13	8	0.08498	3
		6	0.32	0.00883	5	0.00762	13	8	0.07088	3
		7	0.32	0.00866	5	0.00938	13	8	0.05838	3
		8	0.32	0.00869	5	0.009	13	8	0.06768	3
		9	0.32	0.00873	5	0.00845	13	8	0.08411	3
		10	0.32	0.00886	5	0.01115	13	8	0.12718	3
		11	0.32	0.00907	5	0.01492	13	8	0.17464	3
		12	0.32	0.00899	5	0.02081	13	8	0.21513	3
	<End>
<End>
<State Association>
	DiseaseID	5	1
	StateID	24
	NumExits	1
		<Age ID>	<DW>	<Baseline Prevalence>	<TransName>	<Rate>	<ToState>
	<Start>
		1	0	0	5	0	13
		2	0	0	5	0	13
		3	0	0	5	0	13
		4	0	0	5	0	13
		5	0	0	5	0	13
		6	0	0	5	0	13
		7	0	0	5	0	13
		8	0	0	5	0	13
		9	0	0	5	0	13
		10	0	0	5	0	13
		11	0	0	5	0	13
		12	0	0	5	0	13
	<End>
<End>
<State Association>
	DiseaseID	5	2
	StateID	3
	NumExits	2
		<Age ID>	<DW>	<Baseline Prevalence>	<TransName>	<Rate>	<ToState>	<TransName>	<Rate>	<ToState>
	<Start>
		1	0.04805	0	2	0.00128	21	3	0	24
		2	0.06205	0	2	0.00098	21	3	0	24
		3	0.07605	0	2	0.00082	21	3	0	24
		4	0.09005	0	2	0.00076	21	3	0	24
		5	0.10406	0	2	0.00067	21	3	0	24
		6	0.11806	0	2	0.00056	21	3	0	24
		7	0.13906	0	2	0.00049	21	3	0	24
		8	0.16706	0	2	0.00057	21	3	0	24
		9	0.19506	0	2	0.00069	21	3	0	24
		10	0.22307	0	2	0.00106	21	3	0	24
		11	0.25107	0	2	0.00147	21	3	0	24
		12	0.28607	0	2	0.00176	21	3	0	24
	<End>
<End>
<State Association>
	DiseaseID	5	2
	StateID	21
	NumExits	2
		<Age ID>	<DW>	<Baseline Prevalence>	<TransName>	<Rate>	<ToState>	<TransName>	<Rate>	<ToState>
	<Start>
		1	0.32	0.00521	5	0.00337	13	8	0.17922	3
		2	0.32	0.00669	5	0.00197	13	8	0.10723	3
		3	0.32	0.00785	5	0.00231	13	8	0.08208	3
		4	0.32	0.00834	5	0.00377	13	8	0.0871	3
		5	0.32	0.00831	5	0.00485	13	8	0.08153	3
		6	0.32	0.00816	5	0.00562	13	8	0.06841	3
		7	0.32	0.00796	5	0.00692	13	8	0.0577	3
		8	0.32	0.00795	5	0.00662	13	8	0.06621	3
		9	0.32	0.008	5	0.00619	13	8	0.08124	3
		10	0.32	0.00815	5	0.00816	13	8	0.12288	3
		11	0.32	0.00834	5	0.01091	13	8	0.16856	3
		12	0.32	0.0083	5	0.01533	13	8	0.20738	3
	<End>
<End>
<State Association>
	DiseaseID	5	2
	StateID	24
	NumExits	1
		<Age ID>	<DW>	<Baseline Prevalence>	<TransName>	<Rate>	<ToState>
	<Start>
		1	0	0	5	0	13
		2	0	0	5	0	13
		3	0	0	5	0	13
		4	0	0	5	0	13
		5	0	0	5	0	13
		6	0	0	5	0	13
		7	0	0	5	0	13
		8	0	0	5	0	13
		9	0	0	5	0	13
		10	0	0	5	0	13
		11	0	0	5	0	13
		12	0	0	5	0	13
	<End>
<End>
<State Association>
	DiseaseID	6	1
	StateID	3
	NumExits	2
		<Age ID>	<DW>	<Baseline Prevalence>	<TransName>	<Rate>	<ToState>	<TransName>	<Rate>	<ToState>
	<Start>
		1	0.04596	0	2	0	22	3	0	24
		2	0.06118	0	2	0.00174	22	3	0	24
		3	0.0764	0	2	0.0087	22	3	0	24
		4	0.09162	0	2	0.01872	22	3	0	24
		5	0.10685	0	2	0.02573	22	3	0	24
		6	0.12207	0	2	0.03002	22	3	0	24
		7	0.1449	0	2	0.02335	22	3	0	24
		8	0.17535	0	2	0.01463	22	3	0	24
		9	0.2058	0	2	0.00797	22	3	0	24
		10	0.23624	0	2	0.0031	22	3	0	24
		11	0.26669	0	2	0.00203	22	3	0	24
		12	0.30474	0	2	0.00106	22	3	0	24
	<End>
<End>
<State Association>
	DiseaseID	6	1
	StateID	22
	NumExits	2
		<Age ID>	<DW>	<Baseline Prevalence>	<TransName>	<Rate>	<ToState>	<TransName>	<Rate>	<ToState>
	<Start>
		1	0.33	0	5	0.00017	13	8	0.0001	3
		2	0.33	0.0015	5	0.00306	13	8	0.13094	3
		3	0.33	0.01063	5	0.00743	13	8	0.44632	3
		4	0.33	0.0242	5	0.00929	13	8	0.68175	3
		5	0.33	0.03516	5	0.01239	13	8	0.6986	3
		6	0.33	0.0504	5	0.01613	13	8	0.52957	3
		7	0.33	0.06595	5	0.0185	13	8	0.34478	3
		8	0.33	0.06146	5	0.02259	13	8	0.24848	3
		9	0.33	0.04232	5	0.03094	13	8	0.23014	3
		10	0.33	0.01961	5	0.03736	13	8	0.2113	3
		11	0.33	0.01186	5	0.03747	13	8	0.18831	3
		12	0.33	0.00776	5	0.03726	13	8	0.16426	3
	<End>
<End>
<State Association>
	DiseaseID	6	1
	StateID	24
	NumExits	1
		<Age ID>	<DW>	<Baseline Prevalence>	<TransName>	<Rate>	<ToState>
	<Start>
		1	0	0	5	0	13
		2	0	0	5	0	13
		3	0	0	5	0	13
		4	0	0	5	0	13
		5	0	0	5	0	13
		6	0	0	5	0	13
		7	0	0	5	0	13
		8	0	0	5	0	13
		9	0	0	5	0	13
		10	0	0	5	0	13
		11	0	0	5	0	13
		12	0	0	5	0	13
	<End>
<End>
<State Association>
	DiseaseID	6	2
	StateID	3
	NumExits	2
		<Age ID>	<DW>	<Baseline Prevalence>	<TransName>	<Rate>	<ToState>	<TransName>	<Rate>	<ToState>
	<Start>
		1	0.04805	0	2	0	22	3	0	24
		2	0.06205	0	2	0.00051	22	3	0	24
		3	0.07605	0	2	0.00252	22	3	0	24
		4	0.09005	0	2	0.00544	22	3	0	24
		5	0.10406	0	2	0.00749	22	3	0	24
		6	0.11806	0	2	0.00877	22	3	0	24
		7	0.13906	0	2	0.00689	22	3	0	24
		8	0.16706	0	2	0.00437	22	3	0	24
		9	0.19506	0	2	0.0024	22	3	0	24
		10	0.22307	0	2	0.00095	22	3	0	24
		11	0.25107	0	2	0.00062	22	3	0	24
		12	0.28607	0	2	0.00032	22	3	0	24
	<End>
<End>
<State Association>
	DiseaseID	6	2
	StateID	22
	NumExits	2
		<Age ID>	<DW>	<Baseline Prevalence>	<TransName>	<Rate>	<ToState>	<TransName>	<Rate>	<ToState>
	<Start>
		1	0.33	0	5	0.0001	13	8	0.0002	3
		2	0.33	0.00044	5	0.00274	13	8	0.15561	3
		3	0.33	0.00291	5	0.00685	13	8	0.52778	3
		4	0.33	0.00643	5	0.00854	13	8	0.80524	3
		5	0.33	0.00925	5	0.01142	13	8	0.83004	3
		6	0.33	0.01337	5	0.01491	13	8	0.63713	3
		7	0.33	0.01752	5	0.01705	13	8	0.41683	3
		8	0.33	0.0165	5	0.02079	13	8	0.29844	3
		9	0.33	0.01127	5	0.02848	13	8	0.27371	3
		10	0.33	0.00516	5	0.0344	13	8	0.24982	3
		11	0.33	0.00319	5	0.03453	13	8	0.22488	3
		12	0.33	0.00206	5	0.03436	13	8	0.19912	3
	<End>
<End>
<State Association>
	DiseaseID	6	2
	StateID	24
	NumExits	1
		<Age ID>	<DW>	<Baseline Prevalence>	<TransName>	<Rate>	<ToState>
	<Start>
		1	0	0	5	0	13
		2	0	0	5	0	13
		3	0	0	5	0	13
		4	0	0	5	0	13
		5	0	0	5	0	13
		6	0	0	5	0	13
		7	0	0	5	0	13
		8	0	0	5	0	13
		9	0	0	5	0	13
		10	0	0	5	0	13
		11	0	0	5	0	13
		12	0	0	5	0	13
	<End>
<End>
<State Association>
	DiseaseID	10	1
	StateID	3
	NumExits	2
		<Age ID>	<DW>	<Baseline Prevalence>	<TransName>	<Rate>	<ToState>	<TransName>	<Rate>	<ToState>
	<Start>
		1	0.04596	0	2	0	47	3	0	24
		2	0.06118	0	2	0.02678	47	3	0	24
		3	0.0764	0	2	0.01462	47	3	0	24
		4	0.09162	0	2	0.00295	47	3	0	24
		5	0.10685	0	2	0	47	3	0	24
		6	0.12207	0	2	0	47	3	0	24
		7	0.1449	0	2	0	47	3	0	24
		8	0.17535	0	2	0	47	3	0	24
		9	0.2058	0	2	0	47	3	0	24
		10	0.23624	0	2	0	47	3	0	24
		11	0.26669	0	2	0	47	3	0	24
		12	0.30474	0	2	0	47	3	0	24
	<End>
<End>
<State Association>
	DiseaseID	10	1
	StateID	47
	NumExits	2
		<Age ID>	<DW>	<Baseline Prevalence>	<TransName>	<Rate>	<ToState>	<TransName>	<Rate>	<ToState>
	<Start>
		1	0.24	0	5	0	13	8	0	3
		2	0.24	0.01691	5	0	13	8	0.24904	3
		3	0.24	0.0173	5	0	13	8	0.15012	3
		4	0.24	0.0165	5	0	13	8	0.06078	3
		5	0.24	0	5	0	13	8	0	3
		6	0.24	0	5	0	13	8	0	3
		7	0.24	0	5	0	13	8	0	3
		8	0.24	0	5	0	13	8	0	3
		9	0.24	0	5	0	13	8	0	3
		10	0.24	0	5	0	13	8	0	3
		11	0.24	0	5	0	13	8	0	3
		12	0.24	0	5	0	13	8	0	3
	<End>
<End>
<State Association>
	DiseaseID	10	1
	StateID	24
	NumExits	1
		<Age ID>	<DW>	<Baseline Prevalence>	<TransName>	<Rate>	<ToState>
	<Start>
		1	0	0	5	0	13
		2	0	0	5	0	13
		3	0	0	5	0	13
		4	0	0	5	0	13
		5	0	0	5	0	13
		6	0	0	5	0	13
		7	0	0	5	0	13
		8	0	0	5	0	13
		9	0	0	5	0	13
		10	0	0	5	0	13
		11	0	0	5	0	13
		12	0	0	5	0	13
	<End>
<End>
<State Association>
	DiseaseID	10	2
	StateID	3
	NumExits	2
		<Age ID>	<DW>	<Baseline Prevalence>	<TransName>	<Rate>	<ToState>	<TransName>	<Rate>	<ToState>
	<Start>
		1	0.04805	0	2	0	47	3	0	24
		2	0.06205	0	2	0.00991	47	3	0	24
		3	0.07605	0	2	0.00541	47	3	0	24
		4	0.09005	0	2	0.00109	47	3	0	24
		5	0.10406	0	2	0	47	3	0	24
		6	0.11806	0	2	0	47	3	0	24
		7	0.13906	0	2	0	47	3	0	24
		8	0.16706	0	2	0	47	3	0	24
		9	0.19506	0	2	0	47	3	0	24
		10	0.22307	0	2	0	47	3	0	24
		11	0.25107	0	2	0	47	3	0	24
		12	0.28607	0	2	0	47	3	0	24
	<End>
<End>
<State Association>
	DiseaseID	10	2
	StateID	47
	NumExits	2
		<Age ID>	<DW>	<Baseline Prevalence>	<TransName>	<Rate>	<ToState>	<TransName>	<Rate>	<ToState>
	<Start>
		1	0.24	0	5	0	13	8	0	3
		2	0.24	0.0142	5	0	13	8	0.3389	3
		3	0.24	0.01414	5	0	13	8	0.21056	3
		4	0.24	0.01316	5	0	13	8	0.09502	3
		5	0.24	0	5	0	13	8	0	3
		6	0.24	0	5	0	13	8	0	3
		7	0.24	0	5	0	13	8	0	3
		8	0.24	0	5	0	13	8	0	3
		9	0.24	0	5	0	13	8	0	3
		10	0.24	0	5	0	13	8	0	3
		11	0.24	0	5	0	13	8	0	3
		12	0.24	0	5	0	13	8	0	3
	<End>
<End>
<State Association>
	DiseaseID	10	2
	StateID	24
	NumExits	1
		<Age ID>	<DW>	<Baseline Prevalence>	<TransName>	<Rate>	<ToState>
	<Start>
		1	0	0	5	0	13
		2	0	0	5	0	13
		3	0	0	5	0	13
		4	0	0	5	0	13
		5	0	0	5	0	13
		6	0	0	5	0	13
		7	0	0	5	0	13
		8	0	0	5	0	13
		9	0	0	5	0	13
		10	0	0	5	0	13
		11	0	0	5	0	13
		12	0	0	5	0	13
	<End>
<End>
<State Association>
	DiseaseID	11	1
	StateID	3
	NumExits	2
		<Age ID>	<DW>	<Baseline Prevalence>	<TransName>	<Rate>	<ToState>	<TransName>	<Rate>	<ToState>
	<Start>
		1	0.04596	0	2	0	48	3	0	24
		2	0.06118	0	2	0.00696	48	3	0	24
		3	0.0764	0	2	0	48	3	0	24
		4	0.09162	0	2	0	48	3	0	24
		5	0.10685	0	2	0	48	3	0	24
		6	0.12207	0	2	0	48	3	0	24
		7	0.1449	0	2	0	48	3	0	24
		8	0.17535	0	2	0	48	3	0	24
		9	0.2058	0	2	0	48	3	0	24
		10	0.23624	0	2	0	48	3	0	24
		11	0.26669	0	2	0	48	3	0	24
		12	0.30474	0	2	0	48	3	0	24
	<End>
<End>
<State Association>
	DiseaseID	11	1
	StateID	48
	NumExits	2
		<Age ID>	<DW>	<Baseline Prevalence>	<TransName>	<Rate>	<ToState>	<TransName>	<Rate>	<ToState>
	<Start>
		1	0.05	0	5	0	13	8	0	3
		2	0.05	0.01289	5	0	13	8	0.04622	3
		3	0.05	0.02671	5	0	13	8	0.06185	3
		4	0.05	0.01905	5	0	13	8	0.07875	3
		5	0.05	0	5	0	13	8	0	3
		6	0.05	0	5	0	13	8	0	3
		7	0.05	0	5	0	13	8	0	3
		8	0.05	0	5	0	13	8	0	3
		9	0.05	0	5	0	13	8	0	3
		10	0.05	0	5	0	13	8	0	3
		11	0.05	0	5	0	13	8	0	3
		12	0.05	0	5	0	13	8	0	3
	<End>
<End>
<State Association>
	DiseaseID	11	1
	StateID	24
	NumExits	1
		<Age ID>	<DW>	<Baseline Prevalence>	<TransName>	<Rate>	<ToState>
	<Start>
		1	0	0	5	0	13
		2	0	0	5	0	13
		3	0	0	5	0	13
		4	0	0	5	0	13
		5	0	0	5	0	13
		6	0	0	5	0	13
		7	0	0	5	0	13
		8	0	0	5	0	13
		9	0	0	5	0	13
		10	0	0	5	0	13
		11	0	0	5	0	13
		12	0	0	5	0	13
	<End>
<End>
<State Association>
	DiseaseID	11	2
	StateID	3
	NumExits	2
		<Age ID>	<DW>	<Baseline Prevalence>	<TransName>	<Rate>	<ToState>	<TransName>	<Rate>	<ToState>
	<Start>
		1	0.04805	0	2	0	48	3	0	24
		2	0.06205	0	2	0.00233	48	3	0	24
		3	0.07605	0	2	0	48	3	0	24
		4	0.09005	0	2	0	48	3	0	24
		5	0.10406	0	2	0	48	3	0	24
		6	0.11806	0	2	0	48	3	0	24
		7	0.13906	0	2	0	48	3	0	24
		8	0.16706	0	2	0	48	3	0	24
		9	0.19506	0	2	0	48	3	0	24
		10	0.22307	0	2	0	48	3	0	24
		11	0.25107	0	2	0	48	3	0	24
		12	0.28607	0	2	0	48	3	0	24
	<End>
<End>
<State Association>
	DiseaseID	11	2
	StateID	48
	NumExits	2
		<Age ID>	<DW>	<Baseline Prevalence>	<TransName>	<Rate>	<ToState>	<TransName>	<Rate>	<ToState>
	<Start>
		1	0.05	0	5	0	13	8	0	3
		2	0.05	0.00432	5	0	13	8	0.06086	3
		3	0.05	0.00849	5	0	13	8	0.07946	3
		4	0.05	0.00554	5	0	13	8	0.09636	3
		5	0.05	0	5	0	13	8	0	3
		6	0.05	0	5	0	13	8	0	3
		7	0.05	0	5	0	13	8	0	3
		8	0.05	0	5	0	13	8	0	3
		9	0.05	0	5	0	13	8	0	3
		10	0.05	0	5	0	13	8	0	3
		11	0.05	0	5	0	13	8	0	3
		12	0.05	0	5	0	13	8	0	3
	<End>
<End>
<State Association>
	DiseaseID	11	2
	StateID	24
	NumExits	1
		<Age ID>	<DW>	<Baseline Prevalence>	<TransName>	<Rate>	<ToState>
	<Start>
		1	0	0	5	0	13
		2	0	0	5	0	13
		3	0	0	5	0	13
		4	0	0	5	0	13
		5	0	0	5	0	13
		6	0	0	5	0	13
		7	0	0	5	0	13
		8	0	0	5	0	13
		9	0	0	5	0	13
		10	0	0	5	0	13
		11	0	0	5	0	13
		12	0	0	5	0	13
	<End>
<End>
<State Association>
	DiseaseID	13	1
	StateID	3
	NumExits	2
		<Age ID>	<DW>	<Baseline Prevalence>	<TransName>	<Rate>	<ToState>	<TransName>	<Rate>	<ToState>
	<Start>
		1	0.04596	0	2	0.0006	50	3	0	24
		2	0.06118	0	2	0.0009	50	3	0	24
		3	0.0764	0	2	0.0011	50	3	0	24
		4	0.09162	0	2	0.0011	50	3	0	24
		5	0.10685	0	2	0.0012	50	3	0	24
		6	0.12207	0	2	0.0013	50	3	0	24
		7	0.1449	0	2	0.0019	50	3	0	24
		8	0.17535	0	2	0.0027	50	3	0	24
		9	0.2058	0	2	0.0045	50	3	0	24
		10	0.23624	0	2	0.0078	50	3	0	24
		11	0.26669	0	2	0.0192	50	3	0	24
		12	0.30474	0	2	0.049	50	3	0	24
	<End>
<End>
<State Association>
	DiseaseID	13	1
	StateID	50
	NumExits	2
		<Age ID>	<DW>	<Baseline Prevalence>	<TransName>	<Rate>	<ToState>	<TransName>	<Rate>	<ToState>
	<Start>
		1	0.09659	0.0013	5	0	13	8	0	3
		2	0.09659	0.005	5	0	13	8	0	3
		3	0.09659	0.0101	5	0	13	8	0	3
		4	0.09659	0.0155	5	0	13	8	0	3
		5	0.09659	0.0211	5	0.0001	13	8	0	3
		6	0.09659	0.0267	5	0.0001	13	8	0	3
		7	0.09659	0.0374	5	0.0002	13	8	0	3
		8	0.09659	0.0563	5	0.0004	13	8	0	3
		9	0.09659	0.0824	5	0.001	13	8	0	3
		10	0.09659	0.1206	5	0.0028	13	8	0	3
		11	0.09659	0.1732	5	0.0082	13	8	0	3
		12	0.09659	0.3114	5	0.035	13	8	0	3
	<End>
<End>
<State Association>
	DiseaseID	13	1
	StateID	24
	NumExits	1
		<Age ID>	<DW>	<Baseline Prevalence>	<TransName>	<Rate>	<ToState>
	<Start>
		1	0	0	5	0	13
		2	0	0	5	0	13
		3	0	0	5	0	13
		4	0	0	5	0	13
		5	0	0	5	0	13
		6	0	0	5	0	13
		7	0	0	5	0	13
		8	0	0	5	0	13
		9	0	0	5	0	13
		10	0	0	5	0	13
		11	0	0	5	0	13
		12	0	0	5	0	13
	<End>
<End>
<State Association>
	DiseaseID	13	2
	StateID	3
	NumExits	2
		<Age ID>	<DW>	<Baseline Prevalence>	<TransName>	<Rate>	<ToState>	<TransName>	<Rate>	<ToState>
	<Start>
		1	0.04805	0	2	0.0005	50	3	0	24
		2	0.06205	0	2	0.0008	50	3	0	24
		3	0.07605	0	2	0.0009	50	3	0	24
		4	0.09005	0	2	0.001	50	3	0	24
		5	0.10406	0	2	0.001	50	3	0	24
		6	0.11806	0	2	0.001	50	3	0	24
		7	0.13906	0	2	0.0014	50	3	0	24
		8	0.16706	0	2	0.002	50	3	0	24
		9	0.19506	0	2	0.0033	50	3	0	24
		10	0.22307	0	2	0.0055	50	3	0	24
		11	0.25107	0	2	0.0139	50	3	0	24
		12	0.28607	0	2	0.032	50	3	0	24
	<End>
<End>
<State Association>
	DiseaseID	13	2
	StateID	50
	NumExits	2
		<Age ID>	<DW>	<Baseline Prevalence>	<TransName>	<Rate>	<ToState>	<TransName>	<Rate>	<ToState>
	<Start>
		1	0.10057	0.0011	5	0	13	8	0	3
		2	0.10057	0.0041	5	0	13	8	0	3
		3	0.10057	0.0084	5	0	13	8	0	3
		4	0.10057	0.0131	5	0	13	8	0	3
		5	0.10057	0.0178	5	0	13	8	0	3
		6	0.10057	0.0224	5	0.0001	13	8	0	3
		7	0.10057	0.0308	5	0.0001	13	8	0	3
		8	0.10057	0.0454	5	0.0002	13	8	0	3
		9	0.10057	0.0662	5	0.0005	13	8	0	3
		10	0.10057	0.0971	5	0.0016	13	8	0	3
		11	0.10057	0.1404	5	0.0049	13	8	0	3
		12	0.10057	0.2621	5	0.0209	13	8	0	3
	<End>
<End>
<State Association>
	DiseaseID	13	2
	StateID	24
	NumExits	1
		<Age ID>	<DW>	<Baseline Prevalence>	<TransName>	<Rate>	<ToState>
	<Start>
		1	0	0	5	0	13
		2	0	0	5	0	13
		3	0	0	5	0	13
		4	0	0	5	0	13
		5	0	0	5	0	13
		6	0	0	5	0	13
		7	0	0	5	0	13
		8	0	0	5	0	13
		9	0	0	5	0	13
		10	0	0	5	0	13
		11	0	0	5	0	13
		12	0	0	5	0	13
	<End>
<End>
<State Association>
	DiseaseID	14	1
	StateID	3
	NumExits	2
		<Age ID>	<DW>	<Baseline Prevalence>	<TransName>	<Rate>	<ToState>	<TransName>	<Rate>	<ToState>
	<Start>
		1	0.04596	0	2	0.0057	52	3	0	24
		2	0.06118	0	2	0.0317	52	3	0	24
		3	0.0764	0	2	0.026	52	3	0	24
		4	0.09162	0	2	0.0026	52	3	0	24
		5	0.10685	0	2	0.0005	52	3	0	24
		6	0.12207	0	2	0.0015	52	3	0	24
		7	0.1449	0	2	0.0026	52	3	0	24
		8	0.17535	0	2	0.003	52	3	0	24
		9	0.2058	0	2	0.0028	52	3	0	24
		10	0.23624	0	2	0.0032	52	3	0	24
		11	0.26669	0	2	0.0043	52	3	0	24
		12	0.30474	0	2	0.0068	52	3	0	24
	<End>
<End>
<State Association>
	DiseaseID	14	1
	StateID	52
	NumExits	2
		<Age ID>	<DW>	<Baseline Prevalence>	<TransName>	<Rate>	<ToState>	<TransName>	<Rate>	<ToState>
	<Start>
		1	0.06752	0.0073	5	0	13	8	0.0534	3
		2	0.06752	0.0809	5	0	13	8	0.0715	3
		3	0.06752	0.1708	5	0	13	8	0.0892	3
		4	0.06752	0.1438	5	0	13	8	0.1019	3
		5	0.06752	0.0868	5	0	13	8	0.1077	3
		6	0.06752	0.0552	5	0	13	8	0.0984	3
		7	0.06752	0.0429	5	0	13	8	0.0655	3
		8	0.06752	0.047	5	0	13	8	0.0444	3
		9	0.06752	0.0541	5	0	13	8	0.0346	3
		10	0.06752	0.0618	5	0	13	8	0.0365	3
		11	0.06752	0.0701	5	0	13	8	0.0331	3
		12	0.06752	0.1041	5	0	13	8	0.032	3
	<End>
<End>
<State Association>
	DiseaseID	14	1
	StateID	24
	NumExits	1
		<Age ID>	<DW>	<Baseline Prevalence>	<TransName>	<Rate>	<ToState>
	<Start>
		1	0	0	5	0	13
		2	0	0	5	0	13
		3	0	0	5	0	13
		4	0	0	5	0	13
		5	0	0	5	0	13
		6	0	0	5	0	13
		7	0	0	5	0	13
		8	0	0	5	0	13
		9	0	0	5	0	13
		10	0	0	5	0	13
		11	0	0	5	0	13
		12	0	0	5	0	13
	<End>
<End>
<State Association>
	DiseaseID	14	2
	StateID	3
	NumExits	2
		<Age ID>	<DW>	<Baseline Prevalence>	<TransName>	<Rate>	<ToState>	<TransName>	<Rate>	<ToState>
	<Start>
		1	0.04805	0	2	0.0063	52	3	0	24
		2	0.06205	0	2	0.0362	52	3	0	24
		3	0.07605	0	2	0.0298	52	3	0	24
		4	0.09005	0	2	0.003	52	3	0	24
		5	0.10406	0	2	0	52	3	0	24
		6	0.11806	0	2	0	52	3	0	24
		7	0.13906	0	2	0	52	3	0	24
		8	0.16706	0	2	0.0006	52	3	0	24
		9	0.19506	0	2	0.002	52	3	0	24
		10	0.22307	0	2	0.0034	52	3	0	24
		11	0.25107	0	2	0.0053	52	3	0	24
		12	0.28607	0	2	0.0084	52	3	0	24
	<End>
<End>
<State Association>
	DiseaseID	14	2
	StateID	52
	NumExits	2
		<Age ID>	<DW>	<Baseline Prevalence>	<TransName>	<Rate>	<ToState>	<TransName>	<Rate>	<ToState>
	<Start>
		1	0.06752	0.0077	5	0	13	8	0.0535	3
		2	0.06752	0.0909	5	0	13	8	0.0702	3
		3	0.06752	0.1954	5	0	13	8	0.0789	3
		4	0.06752	0.1769	5	0	13	8	0.0769	3
		5	0.06752	0.1235	5	0	13	8	0.0724	3
		6	0.06752	0.0878	5	0	13	8	0.0612	3
		7	0.06752	0.0666	5	0	13	8	0.022	3
		8	0.06752	0.0585	5	0	13	8	0.0149	3
		9	0.06752	0.0614	5	0	13	8	0.0177	3
		10	0.06752	0.0689	5	0	13	8	0.034	3
		11	0.06752	0.0793	5	0	13	8	0.0331	3
		12	0.06752	0.1239	5	0	13	8	0.032	3
	<End>
<End>
<State Association>
	DiseaseID	14	2
	StateID	24
	NumExits	1
		<Age ID>	<DW>	<Baseline Prevalence>	<TransName>	<Rate>	<ToState>
	<Start>
		1	0	0	5	0	13
		2	0	0	5	0	13
		3	0	0	5	0	13
		4	0	0	5	0	13
		5	0	0	5	0	13
		6	0	0	5	0	13
		7	0	0	5	0	13
		8	0	0	5	0	13
		9	0	0	5	0	13
		10	0	0	5	0	13
		11	0	0	5	0	13
		12	0	0	5	0	13
	<End>
<End>
<Risk Association>
	DiseaseID	1	1
	StateID	3
	NumRisks	10
		<Age ID>	<Risk ID>	<Trans ID>	<To State>	<Risk Prev>	<Risk Value>	<Risk ID>	<Trans ID>	<To State>	<Risk Prev>	<Risk Value>	<Risk ID>	<Trans ID>	<To State>	<Risk Prev>	<Risk Value>	<Risk ID>	<Trans ID>	<To State>	<Risk Prev>	<Risk Value>	<Risk ID>	<Trans ID>	<To State>	<Risk Prev>	<Risk Value>	<Risk ID>	<Trans ID>	<To State>	<Risk Prev>	<Risk Value>	<Risk ID>	<Trans ID>	<To State>	<Risk Prev>	<Risk Value>	<Risk ID>	<Trans ID>	<To State>	<Risk Prev>	<Risk Value>	<Risk ID>	<Trans ID>	<To State>	<Risk Prev>	<Risk Value>	<Risk ID>	<Trans ID>
	<Start>
		1	15	2	4	0	0	16	2	4	0	0	17	2	4	0	0	18	2	4	0	0	19	2	4	0	0	20	2	4	0	0	21	2	4	0	0	22	2	4	0	0	13	2	4	0	0	14	2
		2	15	2	4	0	0	16	2	4	0	0	17	2	4	0	0	18	2	4	0	0	19	2	4	0	0	20	2	4	0	0	21	2	4	0	0	22	2	4	0	0	13	2	4	0	0	14	2
		3	15	2	4	0	0	16	2	4	0	0	17	2	4	0	0	18	2	4	0	0	19	2	4	0	0	20	2	4	0	0	21	2	4	0	0	22	2	4	0	0	13	2	4	0	0	14	2
		4	15	2	4	0	0	16	2	4	0	0	17	2	4	0	0	18	2	4	0	0	19	2	4	0	0	20	2	4	0	0	21	2	4	0	0	22	2	4	0	0	13	2	4	0	0	14	2
		5	15	2	4	0	0	16	2	4	0	0	17	2	4	0	0	18	2	4	0	0	19	2	4	0	0	20	2	4	0	0	21	2	4	0	0	22	2	4	0	0	13	2	4	0	0	14	2
		6	15	2	4	0	0	16	2	4	0	0	17	2	4	0	0	18	2	4	0	0	19	2	4	0	0	20	2	4	0	0	21	2	4	0	0	22	2	4	0	0	13	2	4	0	0	14	2
		7	15	2	4	0.04	0.64434	16	2	4	0	0.26353	17	2	4	0.005	11.92048	18	2	4	0	0.89476	19	2	4	0.11	0.96773	20	2	4	0	0.26353	21	2	4	0.025	11.92048	22	2	4	0	0.89476	13	2	4	0	13.42939	14	2
		8	15	2	4	0.33	1.26435	16	2	4	31.85	0.68452	17	2	4	0.12	4.15957	18	2	4	1.2	0.96144	19	2	4	0.85	1.89298	20	2	4	31.85	0.68452	21	2	4	0.23	4.15957	22	2	4	1.2	0.96144	13	2	4	2.25	9.17064	14	2
		9	15	2	4	2.09	0.83741	16	2	4	49.85	1.52388	17	2	4	0.005	9.26005	18	2	4	3.5	2.14036	19	2	4	0.245	4.21416	20	2	4	49.85	1.52388	21	2	4	0.04	9.26005	22	2	4	3.5	2.14036	13	2	4	4.8	12.49531	14	2
		10	15	2	4	2.65	1.21266	16	2	4	59.55	1.94454	17	2	4	0.085	6.03333	18	2	4	4.95	2.51127	19	2	4	2.555	3.42721	20	2	4	59.55	1.94454	21	2	4	0.21	6.03333	22	2	4	4.95	2.51127	13	2	4	13.2	9.74233	14	2
		11	15	2	4	23.15	1.42549	16	2	4	60.5	2.29654	17	2	4	0.045	5.72748	18	2	4	4.2	2.84045	19	2	4	9.925	3.59129	20	2	4	60.5	2.29654	21	2	4	0.075	5.72748	22	2	4	4.2	2.84045	13	2	4	14.5	8.47027	14	2
		12	15	2	4	27.1	1.85919	16	2	4	60.5	2.05428	17	2	4	0.07	7.7533	18	2	4	4.2	3.84512	19	2	4	21.405	2.30615	20	2	4	60.5	2.05428	21	2	4	0.075	7.7533	22	2	4	4.2	3.84512	13	2	4	14.5	6.43941	14	2
	<End>
<End>
<Risk Association>
	DiseaseID	1	1
	StateID	3
	NumRisks	10
		<Age ID>	<Risk ID>	<Trans ID>	<To State>	<Risk Prev>	<Risk Value>	<Risk ID>	<Trans ID>	<To State>	<Risk Prev>	<Risk Value>	<Risk ID>	<Trans ID>	<To State>	<Risk Prev>	<Risk Value>	<Risk ID>	<Trans ID>	<To State>	<Risk Prev>	<Risk Value>	<Risk ID>	<Trans ID>	<To State>	<Risk Prev>	<Risk Value>	<Risk ID>	<Trans ID>	<To State>	<Risk Prev>	<Risk Value>	<Risk ID>	<Trans ID>	<To State>	<Risk Prev>	<Risk Value>	<Risk ID>	<Trans ID>	<To State>	<Risk Prev>	<Risk Value>	<Risk ID>	<Trans ID>	<To State>	<Risk Prev>	<Risk Value>	<Risk ID>	<Trans ID>
	<Start>
		1	15	2	2	0	0	16	2	2	0	0	17	2	2	0	0	18	2	2	0	0	19	2	2	0	0	20	2	2	0	0	21	2	2	0	0	22	2	2	0	0	13	2	2	0	0	14	2
		2	15	2	2	0	0	16	2	2	0	0	17	2	2	0	0	18	2	2	0	0	19	2	2	0	0	20	2	2	0	0	21	2	2	0	0	22	2	2	0	0	13	2	2	0	0	14	2
		3	15	2	2	0	0	16	2	2	0	0	17	2	2	0	0	18	2	2	0	0	19	2	2	0	0	20	2	2	0	0	21	2	2	0	0	22	2	2	0	0	13	2	2	0	0	14	2
		4	15	2	2	0	0	16	2	2	0	0	17	2	2	0	0	18	2	2	0	0	19	2	2	0	0	20	2	2	0	0	21	2	2	0	0	22	2	2	0	0	13	2	2	0	0	14	2
		5	15	2	2	0	0	16	2	2	0	0	17	2	2	0	0	18	2	2	0	0	19	2	2	0	0	20	2	2	0	0	21	2	2	0	0	22	2	2	0	0	13	2	2	0	0	14	2
		6	15	2	2	0	0	16	2	2	0	0	17	2	2	0	0	18	2	2	0	0	19	2	2	0	0	20	2	2	0	0	21	2	2	0	0	22	2	2	0	0	13	2	2	0	0	14	2
		7	15	2	2	0.04	2.5575	16	2	2	0	0.32162	17	2	2	0.005	0.19067	18	2	2	0	0.08705	19	2	2	0.11	1.82426	20	2	2	0	0.32162	21	2	2	0.025	0.19067	22	2	2	0	0.08705	13	2	2	0	0.98411	14	2
		8	15	2	2	0.33	2.35124	16	2	2	31.85	0.82049	17	2	2	0.12	0.52111	18	2	2	1.2	0.28593	19	2	2	0.85	3.23372	20	2	2	31.85	0.82049	21	2	2	0.23	0.52111	22	2	2	1.2	0.28593	13	2	2	2.25	3.71493	14	2
		9	15	2	2	2.09	1.34918	16	2	2	49.85	1.86133	17	2	2	0.005	1.18219	18	2	2	3.5	0.64866	19	2	2	0.245	7.33592	20	2	2	49.85	1.86133	21	2	2	0.04	1.18219	22	2	2	3.5	0.64866	13	2	2	4.8	5.74477	14	2
		10	15	2	2	2.65	2.02509	16	2	2	59.55	3.30503	17	2	2	0.085	2.72338	18	2	2	4.95	1.74296	19	2	2	2.555	8.1667	20	2	2	59.55	3.30503	21	2	2	0.21	2.72338	22	2	2	4.95	1.74296	13	2	2	13.2	14.50948	14	2
		11	15	2	2	23.15	2.81983	16	2	2	60.5	4.1141	17	2	2	0.045	3.61138	18	2	2	4.2	2.63817	19	2	2	9.925	7.73856	20	2	2	60.5	4.1141	21	2	2	0.075	3.61138	22	2	2	4.2	2.63817	13	2	2	14.5	13.63383	14	2
		12	15	2	2	27.1	4.03786	16	2	2	60.5	4.54692	17	2	2	0.07	4.08784	18	2	2	4.2	3.44065	19	2	2	21.405	6.61378	20	2	2	60.5	4.54692	21	2	2	0.075	4.08784	22	2	2	4.2	3.44065	13	2	2	14.5	16.76092	14	2
	<End>
<End>
<Risk Association>
	DiseaseID	1	2
	StateID	3
	NumRisks	10
		<Age ID>	<Risk ID>	<Trans ID>	<To State>	<Risk Prev>	<Risk Value>	<Risk ID>	<Trans ID>	<To State>	<Risk Prev>	<Risk Value>	<Risk ID>	<Trans ID>	<To State>	<Risk Prev>	<Risk Value>	<Risk ID>	<Trans ID>	<To State>	<Risk Prev>	<Risk Value>	<Risk ID>	<Trans ID>	<To State>	<Risk Prev>	<Risk Value>	<Risk ID>	<Trans ID>	<To State>	<Risk Prev>	<Risk Value>	<Risk ID>	<Trans ID>	<To State>	<Risk Prev>	<Risk Value>	<Risk ID>	<Trans ID>	<To State>	<Risk Prev>	<Risk Value>	<Risk ID>	<Trans ID>	<To State>	<Risk Prev>	<Risk Value>	<Risk ID>	<Trans ID>
	<Start>
		1	15	2	4	0	0	16	2	4	0	0	17	2	4	0	0	18	2	4	0	0	19	2	4	0	0	20	2	4	0	0	21	2	4	0	0	22	2	4	0	0	13	2	4	0	0	14	2
		2	15	2	4	0	0	16	2	4	0	0	17	2	4	0	0	18	2	4	0	0	19	2	4	0	0	20	2	4	0	0	21	2	4	0	0	22	2	4	0	0	13	2	4	0	0	14	2
		3	15	2	4	0	0	16	2	4	0	0	17	2	4	0	0	18	2	4	0	0	19	2	4	0	0	20	2	4	0	0	21	2	4	0	0	22	2	4	0	0	13	2	4	0	0	14	2
		4	15	2	4	0	0	16	2	4	0	0	17	2	4	0	0	18	2	4	0	0	19	2	4	0	0	20	2	4	0	0	21	2	4	0	0	22	2	4	0	0	13	2	4	0	0	14	2
		5	15	2	4	0	0	16	2	4	0	0	17	2	4	0	0	18	2	4	0	0	19	2	4	0	0	20	2	4	0	0	21	2	4	0	0	22	2	4	0	0	13	2	4	0	0	14	2
		6	15	2	4	0	0	16	2	4	0	0	17	2	4	0	0	18	2	4	0	0	19	2	4	0	0	20	2	4	0	0	21	2	4	0	0	22	2	4	0	0	13	2	4	0	0	14	2
		7	15	2	4	0.04	0.64434	16	2	4	0	0.26353	17	2	4	0.005	11.92048	18	2	4	0	0.89476	19	2	4	0.11	0.96773	20	2	4	0	0.26353	21	2	4	0.025	11.92048	22	2	4	0	0.89476	13	2	4	0	13.42939	14	2
		8	15	2	4	0.33	1.26435	16	2	4	36.4	0.68452	17	2	4	0.12	4.15957	18	2	4	3.9	0.96144	19	2	4	0.85	1.89298	20	2	4	36.4	0.68452	21	2	4	0.23	4.15957	22	2	4	3.9	0.96144	13	2	4	2.25	9.17064	14	2
		9	15	2	4	2.09	0.83741	16	2	4	56.15	1.52388	17	2	4	0.005	9.26005	18	2	4	6.6	2.14036	19	2	4	0.245	4.21416	20	2	4	56.15	1.52388	21	2	4	0.04	9.26005	22	2	4	6.6	2.14036	13	2	4	4.8	12.49531	14	2
		10	15	2	4	2.65	1.21266	16	2	4	66.95	1.94454	17	2	4	0.085	6.03333	18	2	4	7.6	2.51127	19	2	4	2.555	3.42721	20	2	4	66.95	1.94454	21	2	4	0.21	6.03333	22	2	4	7.6	2.51127	13	2	4	13.2	9.74233	14	2
		11	15	2	4	23.15	1.42549	16	2	4	71.3	2.29654	17	2	4	0.045	5.72748	18	2	4	7.4	2.84045	19	2	4	9.925	3.59129	20	2	4	71.3	2.29654	21	2	4	0.075	5.72748	22	2	4	7.4	2.84045	13	2	4	14.5	8.47027	14	2
		12	15	2	4	27.1	1.85919	16	2	4	71.3	2.05428	17	2	4	0.07	7.7533	18	2	4	7.4	3.84512	19	2	4	21.405	2.30615	20	2	4	71.3	2.05428	21	2	4	0.075	7.7533	22	2	4	7.4	3.84512	13	2	4	14.5	6.43941	14	2
	<End>
<End>
<Risk Association>
	DiseaseID	1	2
	StateID	3
	NumRisks	10
		<Age ID>	<Risk ID>	<Trans ID>	<To State>	<Risk Prev>	<Risk Value>	<Risk ID>	<Trans ID>	<To State>	<Risk Prev>	<Risk Value>	<Risk ID>	<Trans ID>	<To State>	<Risk Prev>	<Risk Value>	<Risk ID>	<Trans ID>	<To State>	<Risk Prev>	<Risk Value>	<Risk ID>	<Trans ID>	<To State>	<Risk Prev>	<Risk Value>	<Risk ID>	<Trans ID>	<To State>	<Risk Prev>	<Risk Value>	<Risk ID>	<Trans ID>	<To State>	<Risk Prev>	<Risk Value>	<Risk ID>	<Trans ID>	<To State>	<Risk Prev>	<Risk Value>	<Risk ID>	<Trans ID>	<To State>	<Risk Prev>	<Risk Value>	<Risk ID>	<Trans ID>
	<Start>
		1	15	2	2	0	0	16	2	2	0	0	17	2	2	0	0	18	2	2	0	0	19	2	2	0	0	20	2	2	0	0	21	2	2	0	0	22	2	2	0	0	13	2	2	0	0	14	2
		2	15	2	2	0	0	16	2	2	0	0	17	2	2	0	0	18	2	2	0	0	19	2	2	0	0	20	2	2	0	0	21	2	2	0	0	22	2	2	0	0	13	2	2	0	0	14	2
		3	15	2	2	0	0	16	2	2	0	0	17	2	2	0	0	18	2	2	0	0	19	2	2	0	0	20	2	2	0	0	21	2	2	0	0	22	2	2	0	0	13	2	2	0	0	14	2
		4	15	2	2	0	0	16	2	2	0	0	17	2	2	0	0	18	2	2	0	0	19	2	2	0	0	20	2	2	0	0	21	2	2	0	0	22	2	2	0	0	13	2	2	0	0	14	2
		5	15	2	2	0	0	16	2	2	0	0	17	2	2	0	0	18	2	2	0	0	19	2	2	0	0	20	2	2	0	0	21	2	2	0	0	22	2	2	0	0	13	2	2	0	0	14	2
		6	15	2	2	0	0	16	2	2	0	0	17	2	2	0	0	18	2	2	0	0	19	2	2	0	0	20	2	2	0	0	21	2	2	0	0	22	2	2	0	0	13	2	2	0	0	14	2
		7	15	2	2	0.04	2.5575	16	2	2	0	0.32162	17	2	2	0.005	0.19067	18	2	2	0	0.08705	19	2	2	0.11	1.82426	20	2	2	0	0.32162	21	2	2	0.025	0.19067	22	2	2	0	0.08705	13	2	2	0	0.98411	14	2
		8	15	2	2	0.33	2.35124	16	2	2	36.4	0.82049	17	2	2	0.12	0.52111	18	2	2	3.9	0.28593	19	2	2	0.85	3.23372	20	2	2	36.4	0.82049	21	2	2	0.23	0.52111	22	2	2	3.9	0.28593	13	2	2	2.25	3.71493	14	2
		9	15	2	2	2.09	1.34918	16	2	2	56.15	1.86133	17	2	2	0.005	1.18219	18	2	2	6.6	0.64866	19	2	2	0.245	7.33592	20	2	2	56.15	1.86133	21	2	2	0.04	1.18219	22	2	2	6.6	0.64866	13	2	2	4.8	5.74477	14	2
		10	15	2	2	2.65	2.02509	16	2	2	66.95	3.30503	17	2	2	0.085	2.72338	18	2	2	7.6	1.74296	19	2	2	2.555	8.1667	20	2	2	66.95	3.30503	21	2	2	0.21	2.72338	22	2	2	7.6	1.74296	13	2	2	13.2	14.50948	14	2
		11	15	2	2	23.15	2.81983	16	2	2	71.3	4.1141	17	2	2	0.045	3.61138	18	2	2	7.4	2.63817	19	2	2	9.925	7.73856	20	2	2	71.3	4.1141	21	2	2	0.075	3.61138	22	2	2	7.4	2.63817	13	2	2	14.5	13.63383	14	2
		12	15	2	2	27.1	4.03786	16	2	2	71.3	4.54692	17	2	2	0.07	4.08784	18	2	2	7.4	3.44065	19	2	2	21.405	6.61378	20	2	2	71.3	4.54692	21	2	2	0.075	4.08784	22	2	2	7.4	3.44065	13	2	2	14.5	16.76092	14	2
	<End>
<End>
<Treatment Association>
	DiseaseID	1	1
	treatID	88
	Set	88
	NumImpacts	2		1	Active
	Sens	100
<PINByYear>
					0	0	0	0	0	0	0	0	0	0	0	0	0	0	0	0
					0	0	0	0	0	0	0	0	0	0	0	0	0	0	0	0
		<Age ID>	<State ID>	<Trans ID>	<ToState ID>	<Impact Value>	<Start Cov>	<Final Cov>	<Year Final Cov>	<State ID>	<Trans ID>	<ToState ID>	<Impact Value>	<Start Cov>	<Final Cov>	<Year Final Cov>
	<Start>
		1	4	5	13	-3.2	0	50	2032	2	5	13	-3.2	0	50	2032
		2	4	5	13	-3.2	0	50	2032	2	5	13	-3.2	0	50	2032
		3	4	5	13	-3.2	0	50	2032	2	5	13	-3.2	0	50	2032
		4	4	5	13	-3.2	10	50	2032	2	5	13	-3.2	10	50	2032
		5	4	5	13	-3.2	10	50	2032	2	5	13	-3.2	10	50	2032
		6	4	5	13	-3.2	10	50	2032	2	5	13	-3.2	10	50	2032
		7	4	5	13	-3.2	10	50	2032	2	5	13	-3.2	10	50	2032
		8	4	5	13	-3.2	10	50	2032	2	5	13	-3.2	10	50	2032
		9	4	5	13	-3.2	10	50	2032	2	5	13	-3.2	10	50	2032
		10	4	5	13	-3.2	10	50	2032	2	5	13	-3.2	10	50	2032
		11	4	5	13	-3.2	10	50	2032	2	5	13	-3.2	10	50	2032
		12	4	5	13	-3.2	10	50	2032	2	5	13	-3.2	10	50	2032
	<End>
<Coverages>
					10	12.66667	15.33333	18	20.66667	23.33333	26	28.66667	31.33333	34	36.66667	39.33333	42	44.66667	47.33333	50
					10	12.66667	15.33333	18	20.66667	23.33333	26	28.66667	31.33333	34	36.66667	39.33333	42	44.66667	47.33333	50
<End>
<Treatment Association>
	DiseaseID	1	1
	treatID	1
	Set	1
	NumImpacts	2		0	Active
	Sens	100
<PINByYear>
					100	100	100	100	100	100	100	100	100	100	100	100	100	100	100	100
					100	100	100	100	100	100	100	100	100	100	100	100	100	100	100	100
		<Age ID>	<State ID>	<Trans ID>	<ToState ID>	<Impact Value>	<Start Cov>	<Final Cov>	<Year Final Cov>	<State ID>	<Trans ID>	<ToState ID>	<Impact Value>	<Start Cov>	<Final Cov>	<Year Final Cov>
	<Start>
		1	4	5	13	-24	80	100	2032	2	5	13	-24	80	100	2032
		2	4	5	13	-24	80	100	2032	2	5	13	-24	80	100	2032
		3	4	5	13	-24	80	100	2032	2	5	13	-24	80	100	2032
		4	4	5	13	-24	80	100	2032	2	5	13	-24	80	100	2032
		5	4	5	13	-24	80	100	2032	2	5	13	-24	80	100	2032
		6	4	5	13	-24	80	100	2032	2	5	13	-24	80	100	2032
		7	4	5	13	-24	80	100	2032	2	5	13	-24	80	100	2032
		8	4	5	13	-24	80	100	2032	2	5	13	-24	80	100	2032
		9	4	5	13	-24	80	100	2032	2	5	13	-24	80	100	2032
		10	4	5	13	-24	80	100	2032	2	5	13	-24	80	100	2032
		11	4	5	13	-24	80	100	2032	2	5	13	-24	80	100	2032
		12	4	5	13	-24	80	100	2032	2	5	13	-24	80	100	2032
	<End>
<Coverages>
					80	81.25	82.5	83.75	85	86.25	87.5	88.75	90	91.25	92.5	93.75	95	96.25	97.5	100
					80	81.25	82.5	83.75	85	86.25	87.5	88.75	90	91.25	92.5	93.75	95	96.25	97.5	100
<End>
<Treatment Association>
	DiseaseID	1	1
	treatID	26
	Set	26
	NumImpacts	1		0	Active
	Sens	100
<PINByYear>
					100	100	100	100	100	100	100	100	100	100	100	100	100	100	100	100
		<Age ID>	<State ID>	<Trans ID>	<ToState ID>	<Impact Value>	<Start Cov>	<Final Cov>	<Year Final Cov>
	<Start>
		1	27	5	13	-46	62.4	75.4	2032
		2	27	5	13	-46	62.4	75.4	2032
		3	27	5	13	-46	62.4	75.4	2032
		4	27	5	13	-46	62.4	75.4	2032
		5	27	5	13	-46	62.4	75.4	2032
		6	27	5	13	-46	62.4	75.4	2032
		7	27	5	13	-46	62.4	75.4	2032
		8	27	5	13	-46	62.4	75.4	2032
		9	27	5	13	-46	62.4	75.4	2032
		10	27	5	13	-46	62.4	75.4	2032
		11	27	5	13	-46	62.4	75.4	2032
		12	27	5	13	-46	62.4	75.4	2032
	<End>
<Coverages>
					62.4	63.2667	64.13333	65	65.8667	66.73333	67.6	68.4667	69.33333	70.2	71.0667	71.93333	72.8	73.6667	74.4792	75.4
<End>
<Treatment Association>
	DiseaseID	1	1
	treatID	27
	Set	27
	NumImpacts	1		0	Active
	Sens	100
<PINByYear>
					100	100	100	100	100	100	100	100	100	100	100	100	100	100	100	100
		<Age ID>	<State ID>	<Trans ID>	<ToState ID>	<Impact Value>	<Start Cov>	<Final Cov>	<Year Final Cov>
	<Start>
		1	26	5	13	-39	50.1	65.1	2032
		2	26	5	13	-39	50.1	65.1	2032
		3	26	5	13	-39	50.1	65.1	2032
		4	26	5	13	-39	50.1	65.1	2032
		5	26	5	13	-39	50.1	65.1	2032
		6	26	5	13	-39	50.1	65.1	2032
		7	26	5	13	-39	50.1	65.1	2032
		8	26	5	13	-39	50.1	65.1	2032
		9	26	5	13	-39	50.1	65.1	2032
		10	26	5	13	-39	50.1	65.1	2032
		11	26	5	13	-39	50.1	65.1	2032
		12	26	5	13	-39	50.1	65.1	2032
	<End>
<Coverages>
					50.1	51.1	52.1	53.1	54.1	55.1	56.1	57.1	58.1	59.1	60.1	61.1	62.1	63.1	64.0375	65.1
<End>
<Treatment Association>
	DiseaseID	1	2
	treatID	88
	Set	88
	NumImpacts	2		1	Active
	Sens	100
<PINByYear>
					0	0	0	0	0	0	0	0	0	0	0	0	0	0	0	0
					0	0	0	0	0	0	0	0	0	0	0	0	0	0	0	0
		<Age ID>	<State ID>	<Trans ID>	<ToState ID>	<Impact Value>	<Start Cov>	<Final Cov>	<Year Final Cov>	<State ID>	<Trans ID>	<ToState ID>	<Impact Value>	<Start Cov>	<Final Cov>	<Year Final Cov>
	<Start>
		1	4	5	13	-3.2	0	50	2032	2	5	13	-3.2	0	50	2032
		2	4	5	13	-3.2	0	50	2032	2	5	13	-3.2	0	50	2032
		3	4	5	13	-3.2	0	50	2032	2	5	13	-3.2	0	50	2032
		4	4	5	13	-3.2	10	50	2032	2	5	13	-3.2	10	50	2032
		5	4	5	13	-3.2	10	50	2032	2	5	13	-3.2	10	50	2032
		6	4	5	13	-3.2	10	50	2032	2	5	13	-3.2	10	50	2032
		7	4	5	13	-3.2	10	50	2032	2	5	13	-3.2	10	50	2032
		8	4	5	13	-3.2	10	50	2032	2	5	13	-3.2	10	50	2032
		9	4	5	13	-3.2	10	50	2032	2	5	13	-3.2	10	50	2032
		10	4	5	13	-3.2	10	50	2032	2	5	13	-3.2	10	50	2032
		11	4	5	13	-3.2	10	50	2032	2	5	13	-3.2	10	50	2032
		12	4	5	13	-3.2	10	50	2032	2	5	13	-3.2	10	50	2032
	<End>
<Coverages>
					10	12.66667	15.33333	18	20.66667	23.33333	26	28.66667	31.33333	34	36.66667	39.33333	42	44.66667	47.33333	50
					10	12.66667	15.33333	18	20.66667	23.33333	26	28.66667	31.33333	34	36.66667	39.33333	42	44.66667	47.33333	50
<End>
<Treatment Association>
	DiseaseID	1	2
	treatID	1
	Set	1
	NumImpacts	2		0	Active
	Sens	100
<PINByYear>
					100	100	100	100	100	100	100	100	100	100	100	100	100	100	100	100
					100	100	100	100	100	100	100	100	100	100	100	100	100	100	100	100
		<Age ID>	<State ID>	<Trans ID>	<ToState ID>	<Impact Value>	<Start Cov>	<Final Cov>	<Year Final Cov>	<State ID>	<Trans ID>	<ToState ID>	<Impact Value>	<Start Cov>	<Final Cov>	<Year Final Cov>
	<Start>
		1	4	5	13	-24	80	100	2032	2	5	13	-24	80	100	2032
		2	4	5	13	-24	80	100	2032	2	5	13	-24	80	100	2032
		3	4	5	13	-24	80	100	2032	2	5	13	-24	80	100	2032
		4	4	5	13	-24	80	100	2032	2	5	13	-24	80	100	2032
		5	4	5	13	-24	80	100	2032	2	5	13	-24	80	100	2032
		6	4	5	13	-24	80	100	2032	2	5	13	-24	80	100	2032
		7	4	5	13	-24	80	100	2032	2	5	13	-24	80	100	2032
		8	4	5	13	-24	80	100	2032	2	5	13	-24	80	100	2032
		9	4	5	13	-24	80	100	2032	2	5	13	-24	80	100	2032
		10	4	5	13	-24	80	100	2032	2	5	13	-24	80	100	2032
		11	4	5	13	-24	80	100	2032	2	5	13	-24	80	100	2032
		12	4	5	13	-24	80	100	2032	2	5	13	-24	80	100	2032
	<End>
<Coverages>
					80	81.25	82.5	83.75	85	86.25	87.5	88.75	90	91.25	92.5	93.75	95	96.25	97.5	100
					80	81.25	82.5	83.75	85	86.25	87.5	88.75	90	91.25	92.5	93.75	95	96.25	97.5	100
<End>
<Treatment Association>
[truncated: 16,339 more rows]
[truncated: 3 more columns]
